## INDEX OF AUTHORS

- Abby-Kalio, N. J. and Warner, G. F.**  
Adduction levers and adductor muscle function in the mandibular system of the shore crab *Carcinus maenas* 125, 309
- Adams, P. R., Jones, S. W., Pennefather, P., Brown, D. A., Koch, C. and Lancaster, B.** Slow synaptic transmission in frog sympathetic ganglia 124, 259
- Aldridge, H. D. J. N.** Kinematics and aerodynamics of the greater horseshoe bat, *Rhinolophus ferrumequinum*, in horizontal flight at various flight speeds 126, 479
- Alexander, David E.** Wind tunnel studies of turns by flying dragonflies 122, 81
- Allison, P. and Benjamin, P. R.** Stimulation of neuritic outgrowth in an undamaged molluscan interneurone 122, 447
- Altringham, J. D. and Johnston, I. A.** Energy cost of contraction in fast and slow muscle fibres isolated from an elasmobranch and an Antarctic teleost fish 121, 239
- Ando, Masaaki, Sasaki, Hiroshi and Huang, Kee C.** A new technique for measuring water transport across the seawater eel intestine 122, 257
- Arechiga, H., Chiquet, M., Kuffler, D. P. and Nicholls, J. G.** Formation of specific connections in culture by identified leech neurones containing serotonin, acetylcholine and peptide transmitters 126, 15
- Arrang, Jean-Michel.** See SCHWARTZ, ARRANG, GARBARG and KORNER
- Axelsson, Michael and Nilsson, Stefan.** Blood pressure control during exercise in the Atlantic cod, *Gadus morhua* 126, 225
- Baguet, F.** See MALLEFET and BAGUET
- Ballantyne, James S.** See MOYES, MOON and BALLANTYNE
- Barber, Andrew.** Intracellular free calcium measured with calcium-selective microelectrodes from salivary gland cells of the snail *Planorbis corneus* 121, 395
- Barnes, W. Jon P.** See KLÄRNER and BARNES
- Barth, Friedrich.** See KLÄRNER and BARTH
- Bartholomew, George A. and Lighton, John R. B.** Oxygen consumption during hover-feeding in free-ranging Anna hummingbirds 123, 191
- Bässler, U.** See WEILAND, BÄSSLER and BRUNNER
- Beal, A. M.** Responsiveness of the parotid salivary gland of red kangaroos (*Macropus rufus*) to mineralocorticoids 120, 309  
—Effects of flow rate, duration of stimulation and mineralocorticoids on the electrolyte concentrations of mandibular saliva from the red kangaroo (*Macropus rufus*) 126, 315
- Beason, Robert C. and Brennan, William J.** Natural and induced magnetization in the bobolink, *Dolichonyx oryzivorus* (Aves: Icteridae) 125, 49
- Beirão, Paulo S and Sorenson, A. L.** Two types of action potentials in a secretory epithelium of a clam mantle 121, 179
- Belardetti, F.** See SIEGELBAUM, BELARDETTI, CAMARDO and SHUSTER
- Belbenoit, Pierre.** Fine analysis of predatory and defensive motor events in *Torpedo marmorata* (Pisces) 121, 197
- Beltz, Barbara S. and Kravitz, Edward A.** Aminergic and peptidergic neuromodulation in Crustacea 124, 115
- Benjamin, P. R.** See ALLISON and BENJAMIN  
—See also KEMENES, ELLIOTT and BENJAMIN
- Bennett, Albert F.** See MARSH and BENNETT
- Berridge, Michael J.** Regulation of ion channels by inositol trisphosphate and diacylglycerol 124, 323
- Bertram, J. E. A. and Gosline, J. M.** Fracture toughness design in horse hoof keratin 125, 29
- Biewener, Andrew A. and Taylor, C. Richard.** Bone strain: a determinant of gait and speed? 123, 383
- Bilbaut, André.** See FEBVRE-CHEVALIER, BILBAUT, BONE and FEBVRE
- Binkle, Ulrike.** See PFLÜGER, ELSON, BINKLE and SCHNEIDER
- Biondi, Angela C.** See WHITTEMBURY, BIONDI, PAZ-ALIAGA, LINARES, PARTHE and LINARES
- Bollenbacher, Walter E.** See ROUNTREE and BOLLENBACHER  
—See also SMITH, BOWEN, BOLLENBACHER and GILBERT
- Bone, Quentin.** See FEBVRE-CHEVALIER, BILBAUT, BONE and FEBVRE

- Boothby, Kate M. and McFarlane, Ian D.** Chemoreception in sea anemones: betaine stimulates the pre-feeding response in *Urticina eques* and *U. felina* **125**, 385
- Boutilier, R. G.** See PRIMMETT, RANDALL, MAZEAUD and BOUTILIER
- See also WOOD, BOUTILIER and RANDALL
- Boutilier, R. G., Emilio, M. G. and Shelton, G.** The effects of mechanical work on electrolyte and water distribution in amphibian skeletal muscle **120**, 333
- Aerobic and anaerobic correlates of mechanical work by gastrocnemius muscles of the aquatic amphibian *Xenopus laevis* **122**, 223
- Boutilier, R. G., Glass, M. L. and Heisler, N.** The relative distribution of pulmonary blood flow in *Rana catesbeiana*: effects of pulmonary or cutaneous hypoxia **126**, 33
- Boutilier, R. G., Iwama, G. K. and Randall, D. J.** The promotion of catecholamine release in rainbow trout, *Salmo gairdneri*, by acute acidosis: interactions between red cell pH and haemoglobin oxygen-carrying capacity **123**, 145
- Boutilier, R. G. and Shelton, G.** Respiratory properties of blood from voluntarily and forcibly submerged *Xenopus laevis* **121**, 285
- Gas exchange, storage and transport in voluntarily diving *Xenopus laevis* **126**, 133
- Boutilier, Robert G. and Shelton, Graham.** The effects of forced and voluntary diving on ventilation, blood gases and pH in the aquatic amphibian, *Xenopus laevis* **122**, 209
- Bowen, M. F.** See SMITH, BOWEN, BOLLENBACHER and GILBERT
- Brackenburg, J. H.** Blood gases and respiratory pattern in exercising fowl: comparison in normoxic and hypoxic conditions **126**, 423
- Braun, Eldon J.** See GOLDSTEIN, HUGHES and BRAUN
- Brennan, William J.** See BEASON and BRENNAN
- Brezden, B. L., Gardner, D. R. and Morris, C. E.** A potassium-selective channel in isolated *Lymnaea stagnalis* heart muscle cells **123**, 175
- Bridges, C. R.** See MORRIS, TYLER-JONES, BRIDGES and TAYLOR
- Brill, Richard W.** See JONES, BRILL and MENSE
- Brown, D. A.** See ADAMS, JONES, PENNEFATHER, BROWN, KOCH and LANCASTER
- Brunner, M.** See WEILAND, BÄSSLER and BRUNNER
- Bryceson, Kim P.** The effect of screening pigment migration on spectral sensitivity in a crayfish reflecting superposition eye **125**, 401
- Bulloch, A. G. M.** See MAETZOLD and BULLOCH
- Burggren, Warren, W.** See PINDER and BURGGREN
- See also WHEATLY, MCMAHON, BURGGREN and PINDER
- Burggren, Warren W. and Feder, Martin E.** Effect of experimental ventilation of the skin on cutaneous gas exchange in the bullfrog **121**, 445
- Butler, P. J.** See STEPHENSON, BUTLER and WOAKES
- See also WOAKES and BUTLER
- Butler, P. J., Metcalfe, J. D. and Ginley, S. A.** Plasma catecholamines in the lesser spotted dogfish and rainbow trout at rest and during different levels of exercise **123**, 409
- Butt, A. G. and Taylor, H. H.** Salt and water balance in the spider, *Porrhothele antipodiana* (Mygalomorpha: Dipluridae): effects of feeding upon hydrated animals **125**, 85
- Byrne, Maria.** Induction of evisceration in the holothurian *Eupentacta quinquesemita* and evidence for the existence of an endogenous evisceration factor **120**, 25
- Calabrese, Ronald L.** See CARROLL, CARROW and CALABRESE
- Calabrese, Ronald L. and Maranto, Anthony R.** Cholinergic action on the heart of the leech, *Hirudo medicinalis* **125**, 205
- Camardo, J. S.** See SIEGELBAUM, BELARDETTI, CAMARDO and SHUSTER
- Campiglia, S. S. and Maddrell, S. H. P.** Ion absorption by the distal tubules of onychophoran nephridia **121**, 43
- Carlson, Albert D. and Evans, Peter D.** Inactivation of octopamine in larval firefly light organs by a high-affinity uptake mechanism **122**, 369
- Carlson, Albert D. and Jalenak, Mary.** Release of octopamine from the photomotor neurones of the larval firefly lanterns **122**, 453

- Carpenter, Roger E.** Flight physiology of intermediate-sized fruit bats (Pteropodidae) 120, 79
- Carroll, Leslie S., Carrow, Grant M. and Calabrese, Ronald L.** Localization and release of FMRFamide-like immunoreactivity in the cerebral neuroendocrine system of *Manduca sexta* 126, 1
- Carrow, Grant M.** See CARROLL, CARROW and CALABRESE
- Chan, P.** See MILSOM and CHAN
- Chancey, B.** See FARRELL, MACLEOD and CHANCEY
- Chiquet, M.** See ARECHIGA, CHIQUET, KUFFLER and NICHOLLS
- Chu, Ka Hou.** Glucose transport by the *in vitro* perfused midgut of the blue crab, *Callinectes sapidus* 123, 325
- Claassen, H.** See KAYAR, CONLEY, CLAASSEN and HOPPELER
- Claiborne, J. B. and Heisler, N.** Acid-base regulation and ion transfers in the carp (*Cyprinus carpio*): pH compensation during graded long- and short-term environmental hypercapnia, and the effect of bicarbonate infusion 126, 41
- Cloarec, Ann.** Distance and size discrimination in a water stick insect, *Ranatra linearis* (Heteroptera) 120, 59
- Coles, Roger B. and Guppy, Anna.** Biophysical aspects of directional hearing in the Tammar wallaby, *Macropus eugenii* 121, 371
- Conley, K. E.** See KAYAR, CONLEY, CLAASSEN and HOPPELER
- Conley, Kevin E. and Porter, Warren P.** Heat loss from deer mice (*Peromyscus*): evaluation of seasonal limits to thermoregulation 126, 249
- Cooper, Kay M. and Hanlon, Roger T.** Correlation of iridescence with changes in iridophore platelet ultrastructure in the squid *Lolliguncula brevis* 121, 451
- Cruse, Holk and Müller, Uwe.** Two coupling mechanisms which determine the coordination of ipsilateral legs in the walking crayfish 121, 349
- Darrig, S.** See HEITLER and DARRIG
- Davie, P. S.** See WELLS, FORSTER, DAVISON, TAYLOR, DAVIE and SATCHELL
- Davis, Robin L.** Influence of oxygen on the heartbeat rhythm of the leech 123, 401
- Davison, W.** See WELLS, FORSTER, DAVISON, TAYLOR, DAVIE and SATCHELL
- Defize, L. H. K.** See MOOLENAAR, DEFIZE and DE LAAT
- de Laet, S. W.** See MOOLENAAR, DEFIZE and DE LAAT
- Deyrup-Olsen, I.** See MARTIN and DEYRUP-OLSEN
- Dizon, Andrew E.** See KIRSCHVINK, DIZON and WESTPHAL
- Dodd, Jane and Jessell, Thomas M.** Cell surface glycoconjugates and carbohydrate-binding proteins: possible recognition signals in sensory neurone development 124, 225
- Dominick, Oliver S. and Truman, James W.** The physiology of wandering behaviour in *Manduca sexta*. III. Organization of wandering behaviour in the larval nervous system 121, 115  
—The physiology of wandering behaviour in *Manduca sexta*. IV. Hormonal induction of wandering behaviour from the isolated nervous system 121, 133
- Dorsett, D. A.** The morphology and physiological properties of the small white neurones in the buccal ganglia of *Tritonia hombergi* 122, 237
- Drummond, Alan H.** Inositol lipid metabolism and signal transduction in clonal pituitary cells 124, 337
- Dubas, Francoise, Hanlon, Roger T., Ferguson, Graham P. and Pinsker, Harold M.** Localization and stimulation of chromatophore motoneurons in the brain of the squid, *Lolliguncula brevis* 121, 1
- Duce, J. A. and Usherwood, P. N. R.** Primary cultures of muscle from embryonic locusts (*Locusta migratoria*, *Schistocerca gregaria*): developmental, electrophysiological and patch-clamp studies 123, 307
- Dunn, J. F. and Hochachka, P. W.** Metabolic responses of trout (*Salmo gairdneri*) to acute environmental hypoxia 123, 229
- Dunne, M. J.** See PETERSEN, FINDLAY, SUZUKI and DUNNE
- Eguchi, Eisuke.** See HARIYAMA, MEYER-ROCHOW and EGUCHI
- Elliott, C. J. H.** See KEMENES, ELLIOTT and BENJAMIN
- Elson, Robert.** See PFLÜGER, ELSON, BINKLE and SCHNEIDER
- Elson, Robert and Pflüger, Hans-Joachim.** The activity of a steering muscle in flying locusts 120, 421

- Elson, Robert C.** *See* SILLAR and ELSON
- Emilio, M. G.** *See* BOUTILIER, EMILIO and SHELTON
- Erlij, D. and Rubio, R.** Control of rectal gland secretion in the dogfish (*Squalus acanthias*): steps in the sequence of activation 122, 99
- Esquivel, Darci Motta S. and Lins de Barros, Henrique G. P.** Motion of magnetotactic microorganisms 121, 153
- Eusebio, Emmanuel J. and Moody, William J.** Calcium-dependent action potentials in the prothoracic gland of *Manduca sexta* 126, 531
- Evans, David H.** *See* KORMANIK and EVANS
- Evans, M. G.** *See* MARTY, EVANS, TAN and TRAUTMANN
- Evans, Peter D.** *See* CARLSON and EVANS  
—*See also* REALE, EVANS and VILLEGAS
- Evans, Peter D. and Myers, Camilla M.** Peptidergic and aminergic modulation of insect skeletal muscle 124, 143  
—The modulatory actions of FMRFamide and related peptides on locust skeletal muscle 126, 403
- Farrell, A. P.** Cardiovascular responses in the sea raven, *Hemitripterus americanus*, elicited by vascular compression 122, 65
- Farrell, A. P., MacLeod, K. R. and Chancey, B.** Intrinsic mechanical properties of the perfused rainbow trout heart and the effects of catecholamines and extracellular calcium under control and acidotic conditions 125, 319
- Farrell, A. P. and Milligan, C. L.** Myocardial intracellular pH in a perfused rainbow trout heart during extracellular acidosis in the presence and absence of adrenaline 125, 347
- Febvre, Jean.** *See* FEBVRE-CHEVALIER, BILBAUT, BONE and FEBVRE
- Febvre-Chevalier, Colette, Bilbaut, André, Bone, Quentin and Febvre, Jean.** Sodium-calcium action potential associated with contraction in the heliozoan *Actinocoryne contractilis* 122, 177
- Feder, Martin E.** Effects of thermal acclimation on locomotor energetics and locomotor performance in a lungless salamander, *Desmognathus ochrophaeus* 121, 271  
—*See also* BURGGREN and FEDER
- Feldman, D.** *See* MCCLESKEY, FOX, FELDMAN and TSIEN
- Fenwick, James C.** *See* FLIK, FENWICK, KOLAR, MAYER-GOSTAN and WENDELAAR BONGA
- Ferguson, Graham P.** *See* DUBAS, HANLON, FERGUSON and PINSKER
- Ferguson, Graham P., Parsons, David W., ter Maat, Andries and Pinsker, Harold M.** Spontaneous and elicited bag cell discharges in gonadectomized *Aplysia* 123, 159
- Findlay, T.** *See* PETERSEN, FINDLAY, SUZUKI and DUNNE
- Flik, Gert, Fenwick, James C., Kolar, Zvonimir, Mayer-Gostan, Nicole and Wendelaar Bonga, Sjoerd E.** Effects of low ambient calcium levels on whole-body  $\text{Ca}^{2+}$  flux rates and internal calcium pools in the freshwater cichlid teleost, *Oreochromis mossambicus* 120, 249
- Flores, Janie M.** *See* TSIN and FLORES
- Forster, M. E.** *See* WELLS, FORSTER, DAVIDSON, TAYLOR, DAVIE and SATCHELL
- Fox, A. P.** *See* MCCLESKEY, FOX, FELDMAN and TSIEN
- Fraser, K.** *See* HEITLER and FRASER
- Full, Robert J.** *See* HERREID and FULL
- Funk, G. D., Webb, C. L. and Milsom, W. K.** Non-invasive measurement of respiratory tidal volume in aquatic, air-breathing animals 126, 519
- Furilla, R. A. and Jones, David R.** The contribution of nasal receptors to the cardiac response to diving in restrained and unrestrained redhead ducks (*Aythya americana*) 121, 227
- Garbarg, Monique.** *See* SCHWARTZ, ARRANG, GARBARG and KORNER
- Gardner, D. R.** *See* BREZDEN, GARDNER and MORRIS
- Gerencser, George A.** Inhibition of a chloride pump by acetazolamide in the intestine of *Aplysia californica* 125, 391
- Gerschenfeld, H. M., Hammond, Constance and Paupardin-Tritsch, Danièle.** Modulation of the calcium current of molluscan neurones by neurotransmitters 124, 73
- Gilbert, Lawrence I.** *See* SMITH, BOWEN, BOLLENBACHER and GILBERT
- Ginley, S. A.** *See* BUTLER, METCALFE and GINLEY
- Glass, M. L.** *See* BOUTILIER, GLASS and HEISLER

- Glass, M. L. and Heisler, N.** The effects of hypercapnia on the arterial acid-base status in the Tegu lizard, *Tupinambis nigropunctatus* 122, 13
- Goldspink, G.** See HEAP, WATT and GOLDSINK
- Goldstein, David L., Hughes, Maryanne R. and Braun, Eldon J.** Role of the lower intestine in the adaptation of gulls (*Larus glaucescens*) to sea water 123, 345
- Golowasch, Jorge, Kirkwood, Alfred and Miller, Christopher.** Allosteric effects of  $Mg^{2+}$  on the gating of  $Ca^{2+}$ -activated  $K^{+}$  channels from mammalian skeletal muscle 124, 5
- Gosline, J. M.** See BERTRAM and GOSLINE
- Govind, C. K., Mearow, K. M. and Wong, A.** Regeneration of fibre types in paired asymmetric closer muscles of the snapping shrimp, *Alpheus heterochelis* 123, 55
- Grieshaber, M. K.** See PÖRTNER, VOGELER and GRIESHABER
- Guppy, Anna.** See COLES and GUPPY
- Gynther, I. C. and Pearson, K. G.** Intracellular recordings from interneurons and motoneurons during bilateral kicks in the locust: implications for mechanisms controlling the jump 122, 323
- Hamm, Iris.** See TAUTZ and HAMM
- Hammond, Constance.** See GERSCHENFELD, HAMMOND and PAUPARDIN-TRITSCH
- Hanlon, Roger T.** See COOPER and HANLON  
—See also DUBAS, HANLON, FERGUSON and PINSKER
- Hariyama, Takahiko, Meyer-Rochow, V. B. and Eguchi, Eisuke.** Diurnal changes in structure and function of the compound eye of *Ligia exotica* (Crustacea, Isopoda) 123, 1
- Hasan, Z.** A triphasic ventilator for reptiles 123, 441
- Hayashi, Yutaka and Motokawa, Tatsuo.** Effects of ionic environment on viscosity of catch connective tissue in holothurian body wall 125, 71
- Heap, S. P., Watt, P. W. and Goldspink, G.** Myofibrillar ATPase activity in the carp *Cyprinus carpio*: interactions between starvation and environmental temperature 123, 373
- Heisler, N.** See BOUTILIER, GLASS and HEISLER  
—See also CLAIBORNE and HEISLER  
—See also GLASS and HEISLER
- Heitler, W. J.** Aspects of sensory integration in the crayfish swimmeret system 120, 387
- Heitler, W. J. and Darrig, S.** The segmental giant neurone of the signal crayfish, *Pacifastacus leniusculus*, and its interactions with abdominal fast flexor and swimmeret motor neurones 121, 55
- Heitler, W. J. and Fraser, K.** The segmental giant neurone of the hermit crab *Eupagurus bernhardus* 125, 245
- Heller, Klaus-Gerhard.** Warm-up and stridulation in the bushcricket, *Hexacentrus unicolor* Serville (Orthoptera, Conocephalidae, Listroscolidinae) 126, 97
- Heming, Tom.** See WRIGHT, HEMING and RANDALL
- Hensler, Klaus.** Intracellular recordings of neck muscle motoneurons during eye cleaning behaviour of the cricket 120, 153
- Herreid, Clyde F., II and Full, Robert J.** Locomotion of hermit crabs (*Coenobita compressus*) on beach and treadmill 120, 283  
—Energetics of hermit crabs during locomotion: the cost of carrying a shell 120, 297
- Higuchi, Takashiro, Nakamura, Hiroyuki, Sawauchi, Katsuhiko and Okumura, Hiroshi.** Withdrawal reflex and conduction block in the giant axons of a sabellid worm (*Pseudopotamilla ocellata*) 126, 433
- Hill, R. B.** See SMITH and HILL
- Hochachka, P. W.** See DUNN and HOCHACHKA
- Hohtola, Esa and Stevens, E. Don.** The relationship of muscle electrical activity, tremor and heat production to shivering thermogenesis in Japanese quail 125, 119
- Hoppeler, H.** See KAYAR, CONLEY, CLAASSEN and HOPPELER
- Huang, Kee C.** See ANDO, SASAKI and HUANG
- Hudson, Dennis M. and Jones, David R.** The influence of body mass on the endurance to restrained submergence in the Pekin duck 120, 351
- Hughes, George M., Perry, Steven F. and Piiper, Johannes.** Morphometry of the gills of the elasmobranch *Scyliorhinus stellaris* in relation to body size 121, 27
- Hughes, Maryanne R.** See GOLDSTEIN, HUGHES and BRAUN

- Inoué, Hiroshi.** *See* NOGUCHI, INOUÉ and KUBO
- Iwama, G. K.** *See* BOUTILIER, IWAMA and RANDALL
- Jahr, C. E.** *See* JESSELL, YOSHIOKA and JAHR
- Jalenak, Mary.** *See* CARLSON and JALENAK
- Jellies, John and Larimer, James L.**  
Activity of crayfish abdominal-positioning interneurons during spontaneous and sensory-evoked movements 120, 173
- Jessell, T. M., Yoshioka, K. and Jahr, C. E.**  
Amino acid receptor-mediated transmission at primary afferent synapses in rat spinal cord 124, 239
- Jessell, Thomas M.** *See* DODD and JESSELL
- Johnston, I. A.** *See* ALTRINGHAM and JOHNSTON
- Johnston, Ian A. and Wokoma, Alele.**  
Effects of temperature and thermal acclimation on contractile properties and metabolism of skeletal muscle in the flounder (*Platichthys flesus* L.) 120, 119
- Jones, David R.** *See* FURILLA and JONES  
—*See also* HUDSON and JONES
- Jones, David R., Brill, Richard W. and Mense, Dennis C.** The influence of blood gas properties on gas tensions and pH of ventral and dorsal aortic blood in free-swimming tuna, *Euthynnus affinis* 120, 201
- Jones, S. W.** *See* ADAMS, JONES, PENNEFATHER, BROWN, KOCH and LANCASTER
- Kaczmarek, L. K.** Phorbol esters, protein phosphorylation and the regulation of neuronal ion channels 124, 375
- Karlsen, Hans E.** *See* SAND and KARLSEN
- Kayar, S. R., Conley, K. E., Claassen, H. and Hoppeler, H.** Capillarity and mitochondrial distribution in rat myocardium following exercise training 120, 189
- Kemenes, G., Elliott, C. J. H. and Benjamin, P. R.** Chemical and tactile inputs to the *Lymnaea* feeding system: effects on behaviour and neural circuitry 122, 113
- Kestler, P.** *See* MACHIN, O'DONNELL and KESTLER
- Kirkwood, Alfred.** *See* GOLOWASCH, KIRKWOOD and MILLER
- Kirschvink, Joseph L., Dizon, Andrew E. and Westphal, James A.** Evidence from strandings for geomagnetic sensitivity in cetaceans 120, 1
- Klärner, Diemut and Barnes, W. Jon P.**  
The cuticular stress detector (CSD2) of the crayfish. II. Activity during walking and influences on leg coordination 122, 161
- Klärner, Diemut and Barth, Friedrich.** The cuticular stress detector (CSD2) of the crayfish. I. Physiological properties 122, 149
- Koch, C.** *See* ADAMS, JONES, PENNEFATHER, BROWN, KOCH and LANCASTER
- Kokubun, S.** *See* REUTER, KOKUBUN and PROD'HOM
- Kolar, Zvonimir.** *See* FLIK, FENWICK, KOLAR, MAYER-GOSTAN and WENDELAAR BONGA
- Kormanik, Gregg A. and Evans, David H.**  
The acid-base status of prenatal pups of the dogfish, *Squalus acanthias*, in the uterine environment 125, 173
- Korner, Marie.** *See* SCHWARTZ, ARRANG, GARBARG and KORNER
- Kravitz, Edward A.** *See* BELTZ and KRAVITZ
- Kristan, William B., Jr.** *See* NUSBAUM and KRISTAN
- Kubo, Kazumi.** *See* NOGUCHI, INOUÉ and KUBO
- Kuffler, D. P.** *See* ARECHIGA, CHIQUET, KUFFLER and NICHOLLS
- Kunnamo-Ojala, Tiina.** *See* NIKINMAA, KUNNAMO-OJALA and RAILO
- Kuterbach, Deborah A. and Walcott, Benjamin.** Iron-containing cells in the honey-bee (*Apis mellifera*). I. Adult morphology and physiology 126, 375  
—Iron-containing cells in the honey-bee (*Apis mellifera*). II. Accumulation during development 126, 389
- Lancaster, B.** *See* ADAMS, JONES, PENNEFATHER, BROWN, KOCH and LANCASTER
- Larimer, James L.** *See* JELLIES and LARIMER
- Lauder, George V.** Aquatic prey capture in fishes: experimental and theoretical approaches 125, 411
- Laurent, Gilles and Richard, Daniel.** The organization and role during locomotion of the proximal musculature of the cricket foreleg. I. Anatomy and innervation 123, 255  
—The organization and role during locomotion of the proximal musculature of the cricket foreleg. II. Electromyographic activity during stepping patterns 123, 285

- Leech, C. A.** Resting potential and potassium-selective electrode measurements in locust skeletal muscles 122, 439
- Patch-clamp recording of potassium channels from glial cells in the cockroach central nervous system 122, 443
- Lemos, José R. and Nordmann, Jean J.** Ionic channels and hormone release from peptidergic nerve terminals 124, 53
- Levitan, Edwin S.** *See* LOTSHAW, LEVITAN and LEVITAN
- Levitan, Irwin B.** *See* LOTSHAW, LEVITAN and LEVITAN
- Lighton, John R. B.** *See* BARTHOLOMEW and LIGHTON
- Linares, Henry.** *See* WHITTEMBURY, BIONDI, PAZ-ALIAGA, LINARES, PARTHE and LINARES
- Linares, Nancy.** *See* WHITTEMBURY, BIONDI, PAZ-ALIAGA, LINARES, PARTHE and LINARES
- Lins de Barros, Henrique G. P.** *See* ESQUIVEL and LINS DE BARROS
- Lococo, D. J., Thompson, C. S. and Tobe, S. S.** Intercellular communication in an insect endocrine gland 121, 407
- Lotshaw, David P., Levitan, Edwin S. and Levitan, Irwin B.** Fine tuning of neuronal electrical activity: modulation of several ion channels by intracellular messengers in a single identified nerve cell 124, 307
- Louw, G. N., Nicolson, S. W. and Seely, M. K.** Respiration beneath desert sand: carbon dioxide diffusion and respiratory patterns in a tenebrionid beetle 120, 443
- Lucu, Cedomil and Siebers, Dietrich.** Amiloride-sensitive sodium flux and potentials in perfused *Carcinus* gill preparations 122, 25
- McCleskey, E. W., Fox, A. P., Feldman, D. and Tsien, R. W.** Different types of calcium channels 124, 177
- McFarlane, Ian D.** *See* BOOTHBY and MCFARLANE
- Machin, J., O'Donnell, M. J. and Kestler, P.** Evidence against hormonal control of integumentary water loss in *Periplaneta americana* 121, 339
- MacLeod, K. R.** *See* FARRELL, MACLEOD and CHANCEY
- McMahon, B. R.** *See* WILKES and MCMAHON
- McMahon, Brian R.** *See* WHEATLY, MCMAHON, BURGGREN and PINDER
- Macmillan, David L.** *See* TANG and MACMILLAN
- Maddrell, S. H. P.** *See* CAMPIGLIA and MADDRELL
- Maetzold, D. J. and Bulloch, A. G. M.** Sprouting by undamaged adult molluscan neurones: putative role for changes in haemolymph osmoregulation 122, 427
- Mallefet, J. and Baguet, F.** Oxygen consumption and luminescence of *Maurolicus* photophores stimulated by potassium cyanide 126, 469
- Maranto, Anthony R.** *See* CALABRESE and MARANTO
- Marsh, Richard L. and Bennett, Albert F.** Thermal dependence of contractile properties of skeletal muscle from the lizard *Sceloporus occidentalis* with comments on methods for fitting and comparing force-velocity curves 126, 63
- Thermal dependence of sprint performance of the lizard *Sceloporus occidentalis* 126, 79
- Martin, A. W. and Deyrup-Olsen, I.** Function of the epithelial channel cells of a terrestrial slug, *Ariolimax columbianus* 121, 301
- Marty, A., Evans, M. G., Tan, Y. P. and Trautmann, A.** Muscarinic response in rat lacrimal glands 124, 15
- Mayer-Gostan, Nicole.** *See* FLIK, FENWICK, KOYAR, MAYER-GOSTAN and WENDELAAR BONGA
- Mazeaud, M.** *See* PRIMMETT, RANDALL, MAZEAUD and BOUTILIER
- Mearow, K. M.** *See* GOVIND, MEAROW and WONG
- Mense, Dennis C.** *See* JONES, BRILL and MENSE
- Messenger, J. B. and Miyan, J. A.** Neural correlates of colour change in cuttlefish 125, 395
- Metcalf, J. D.** *See* BUTLER, METCALFE and GINLEY
- Meyer-Rochow, V. B.** *See* HARIYAMA, MEYER-ROCHOW and EGUCHI
- Miller, Christopher.** *See* GOLOWASCH, KIRKWOOD and MILLER
- Milligan, C. L.** *See* FARRELL and MILLIGAN
- Milligan, C. Louise and Wood, Chris M.** Intracellular and extracellular acid-base status and  $H^+$  exchange with the environment after exhaustive exercise in the rainbow trout 123, 93
- Tissue intracellular acid-base status and the fate of lactate after exhaustive exercise in the rainbow trout 123, 123

- Milsom, W. K.** See FUNK, WEBB and MILSOM
- Milsom, W. K. and Chan, P.** The relationship between lung volume, respiratory drive and breathing pattern in the turtle, *Chrysemys picta* 120, 233
- Milsom, William K.** See VITALIS and MILSOM
- Miyan, J. A.** See MESSENGER and MIYAN
- Miyan, Jaleel A.** See NEIL and MIYAN
- Miyan, Jaleel A. and Neil, Douglas M.** Swimmeret proprioceptors in the lobsters *Nephrops norvegicus* L. and *Homarus gammarus* L. 126, 181
- Mizunami, Makoto and Tateda, Hideki.** Classification of ocellar interneurons in the cockroach brain 125, 57
- Moody, William J.** See EUSEBIO and MOODY
- Moolenaar, W. H., Defize, L. H. K. and de Laat, S. W.** Ionic signalling by growth factor receptors 124, 359
- Moon, Thomas, W.** See MOYES, MOON and BALLANTYNE
- Morisawa, Masaaki.** See MORISAWA and MORISAWA
- Morisawa, Sachiko and Morisawa, Masaaki.** Acquisition of potential for sperm motility in rainbow trout and chum salmon 126, 89
- Morris, C. E.** See BREZDEN, GARDNER and MORRIS
- Morris, S., Tyler-Jones, R., Bridges, C. R. and Taylor, E. W.** The regulation of haemocyanin oxygen affinity during emersion of the crayfish *Austropotamobius pallipes*. II. An investigation of *in vivo* changes in oxygen affinity 121, 327
- Morris, S., Tyler-Jones, R. and Taylor, E. W.** The regulation of haemocyanin oxygen affinity during emersion of the crayfish *Austropotamobius pallipes*. I. An *in vitro* investigation of the interactive effects of calcium and L-lactate on oxygen affinity 121, 315
- Motokawa, Tatsuo.** See HAYASHI and MOTOKAWA
- Moyes, Christopher D., Moon, Thomas, W. and Ballantyne, James W.** Osmotic effects on amino acid oxidation in skate liver mitochondria 125, 181
- Müller, Uwe.** See CRUSE and MÜLLER
- Muntz, W. R. A.** The spectral sensitivity of. *Nautilus pompilius* 126, 513
- Myers, Camilla M.** See EVANS and MYERS
- Nakamura, Hiroyuki.** See HIGUCHI, NAKAMURA, SAWAUCHI and OKUMURA
- Nakaoka, Yasuo.** See OKA, NAKAOKA and OOSAWA
- Neil, Douglas M.** See MIYAN and NEIL
- Neil, Douglas M. and Miyan, Jaleel A.** Phase-dependent modulation of auxiliary swimmeret muscle activity in the equilibrium reactions of the Norway lobster, *Nephrops norvegicus* L. 126, 157
- Newman, D. J. S. and Wootton, R. J.** An approach to the mechanics of pleating in dragonfly wings 125, 361
- Neyton, Jacques and Trautmann, Alain.** Physiological modulation of gap junction permeability 124, 93
- Nguyen Phu, D., Yamaguchi, K., Scheid, P. and Piiper, J.** Kinetics of oxygen uptake and release by red blood cells of chicken and duck 125, 15
- Nicholls, J. G.** See ARECHIGA, CHIQUET, KUFFLER and NICHOLLS
- Nicolson, S. W.** See LOUW, NICOLSON and SEELY
- Nikinmaa, Mikko, Kunnamo-Ojala, Tiina and Railo, Eira.** Mechanisms of pH regulation in lamprey (*Lampetra fluviatilis*) red blood cells 122, 355
- Nilsson, Stefan.** See AXELSSON and NILSSON
- Noguchi, Munenori, Inoué, Hiroshi and Kubo, Kazumi.** Control of the orientation of cilia by ATP and divalent cations in Triton-glycerol-extracted *Paramecium caudatum* 120, 105
- Nordmann, Jean J.** See LEMOS and NORDMANN
- Nusbaum, Michael P.** Synaptic basis of swim initiation in the leech. III. Synaptic effects of serotonin-containing interneurons (cells 21 and 61) on swim CPG neurones (cells 18 and 208) 122, 303
- Nusbaum, Michael P. and Kristan, William B. Jr.** Swim initiation in the leech by serotonin-containing interneurons, cells 21 and 61 122, 277
- O'Donnell, M. J.** Action potentials in *Rhodnius* oocytes: repolarization is sensitive to potassium channel blockers 126, 119
- See also MACHIN, O'DONNELL and KESTLER
- O'Dor, R. K.** See WEBBER and O'DOR
- Ohyama, Takahiro and Toh, Yoshihiro.** Multimodality of ocellar interneurons of the American cockroach 125, 405
- Oka, Takashi, Nakaoka, Yasuo and Oosawa, Fumio.** Changes in membrane potential during adaptation to external potassium ions in *Paramecium caudatum* 126, 111



- Okumura, Hiroshi.** See HIGUCHI, NAKAMURA, SAWAUCHI and OKUMURA
- Oosawa, Fumio.** See OKA, NAKAOKA and OOSAWA
- Osorio, D.** Ultraviolet sensitivity and spectral opponency in the locust 122, 193
- Parsons, David W.** See FERGUSON, PARSONS, TER MAAT and PINSKER
- Parthe, Valentín.** See WHITTEMBURY, BIONDI, PAZ-ALIAGA, LINARES, PARTHE and LINARES
- Partridge, Karen J.** See WESTBY and PARTRIDGE
- Paupardin-Tritsch, Danièle.** See GERSCHENFELD, HAMMOND and PAUPARDIN-TRITSCH
- Paz-Aliaga, Azael.** See WHITTEMBURY, BIONDI, PAZ-ALIAGA, LINARES, PARTHE and LINARES
- Pearson, K. G.** See GYNTHY and PEARSON
- Pennefather, P.** See ADAMS, JONES, PENNEFATHER, BROWN, KOCH and LANCASTER
- Perry, Steven F.** See HUGHES, PERRY and PIIPER  
—See also PIIPER, SCHEID, PERRY and HUGHES
- Petersen, O. H., Findlay, I., Suzuki, K. and Dunne, M. J.** Messenger-mediated control of potassium channels in secretory cells 124, 33
- Pflüger, Hans-Joachim.** See ELSON and PFLÜGER
- Pflüger, Hans-Joachim, Elson, Robert, Binkle, Ulrike and Schneider, Henning.** The central nervous organization of the motor neurones to a steering muscle in locusts 120, 403
- Piiper, J.** See NGUYEN PHU, YAMAGUCHI, SCHEID and PIIPER
- Piiper, Johannes.** See HUGHES, PERRY and PIIPER
- Piiper, Johannes, Scheid, Peter, Perry, Steven F. and Hughes, George M.** Effective and morphometric oxygen-diffusing capacity of the gills of the elasmobranch *Scyliorhinus stellaris* 123, 27
- Pinder, Alan W.** See WHEATLY, McMAHON, BURGREN and PINDER
- Pinder, Alan W. and Burggren, Warren W.** Ventilation and partitioning of oxygen uptake in the frog *Rana pipiens*: effects of hypoxia and activity 126, 453
- Pinsker, Harold M.** See DUBAS, HANLON, FERGUSON and PINSKER  
—See also FERGUSON, PARSONS, TER MAAT and PINSKER
- Porter, Warren P.** See CONLEY and PORTER
- Pörtner, H. O., Vogeler, S. and Grieshaber, M. K.** Recovery from anaerobiosis in the intertidal worm *Sipunculus nudus*. I. Restoration of aerobic, steady-state energy metabolism 122, 37  
—Recovery from anaerobiosis in the intertidal worm *Sipunculus nudus*. II. Gas exchange and changes in the intra- and extracellular acid-base status 122, 51
- Primmatt, D. R. N., Randall, D. J., Mazeaud, M. and Boutilier, R. G.** The role of catecholamines in erythrocyte pH regulation and oxygen transport in rainbow trout (*Salmo gairdneri*) during exercise 122, 139
- Prod'hom, B.** See REUTER, KOKUBUN and PROD'HOM
- Railo, Eira.** See NIKINMAA, KUNNAMO-OJALA and RAILO
- Randall, D. J.** See BOUTILIER, IWAMA and RANDALL  
—See also PRIMMETT, RANDALL, MAZEAUD and BOUTILIER  
—See also WOOD, BOUTILIER and RANDALL
- Randall, David.** See WRIGHT, HEMING and RANDALL
- Reale, Vincenzina, Evans, Peter D. and Villegas, Jorge.** Octopaminergic modulation of the membrane potential of the Schwann cell of the squid giant nerve fibre 121, 421
- Reuter, H., Kokubun, S. and Prod'hom, B.** Properties and modulation of cardiac calcium channels 124, 191
- Richard, Daniel.** See LAURENT and RICHARD
- Riegel, J. A.** Measurement of colloid osmotic pressure of microlitre and sub-microlitre volumes 122, 433  
—Hydrostatic pressures in glomeruli and renal vasculature of the hagfish, *Eptatretus stouti* 123, 359  
—The absence of an arterial pressure effect on filtration by perfused glomeruli of the hagfish, *Eptatretus stouti* (Lockington) 126, 361
- Rossel, Samuel.** Binocular spatial localization in the praying mantis 120, 265
- Rountree, Dorothy B. and Bollenbacher, Walter E.** The release of the prothoracicotropic hormone in the tobacco hornworm, *Manduca sexta*, is controlled intrinsically by juvenile hormone 120, 41

- Rubio, R.** See ERLIJ and RUBIO
- Sand, Olav and Karlsen, Hans E.** Detection of infrasound by the Atlantic cod 125, 197
- Sasaki, Hiroshi.** See ANDO, SASAKI and HUANG
- Satchell, G. H.** See WELLS, FORSTER, DAVISON, TAYLOR, DAVIE and SATCHELL
- Sawauchi, Katsuhiko.** See HIGUCHI, NAKAMURA, SAWAUCHI and OKUMURA
- Scheid, P.** See NGUYEN PHU, YAMAGUCHI, SCHEID and PIIPER
- Scheid, Peter.** See PIIPER, SCHEID, PERRY and HUGHES
- Schmidt, J. M. and Smith, J. J. B.** Correlations between body angles and substrate curvature in the parasitoid wasp *Trichogramma minutum*: a possible mechanism of host radius measurement 125, 271
- Schneider, Henning.** See PFLÜGER, ELSON, BINKLE and SCHNEIDER
- Schofield, P. K. and Treherne, J. E.** Octopamine sensitivity of the blood-brain barrier of an insect 123, 423
- Schwartz, Jean-Charles, Arrang, Jean-Michel, Garbarg, Monique and Korner, Marie.** Properties and roles of the three subclasses of histamine receptors in brain 124, 203
- Secomb, Timothy, W.** See WRIGHT and SECOMB
- Seely, M. K.** See LOUW, NICOLSON and SEELY
- Shelton, G.** See BOUTILIER, EMILIO and SHELTON  
—See also BOUTILIER and SHELTON
- Shelton, Graham.** See BOUTILIER and SHELTON
- Shuster, M. J.** See SIEGELBAUM, BELARDETTI, CAMARDO and SHUSTER
- Shuttleworth, T. J. and Thompson, J. L.** Perfusion-secretion relationships in the isolated elasmobranch rectal gland 125, 373
- Siebers, Dietrich.** See LUCU and SIEBERS
- Siegelbaum, S. A., Belardetti, F., Camardo, J. S. and Shuster, M. J.** Modulation of the serotonin-sensitive potassium channel in *Aplysia* sensory neurone cell body and growth cone 124, 287
- Sillar, Keith T. and Elson, Robert C.** Slow active potentials in walking-leg motor neurones triggered by non-spiking proprioceptive afferents in the crayfish 126, 445
- Smith, J. J. B.** See SCHMIDT and SMITH
- Smith, P. J. S. and Hill, R. B.** Cardiac performance in response to loading pressures and perfusion with 5-hydroxytryptamine in the isolated heart of *Busycon canaliculatum* (Gastropoda, Prosobranchia) 123, 243
- Smith, Wendy A., Bowen, M. F., Bollenbacher, Walter E. and Gilbert, Lawrence I.** Cellular changes in the prothoracic glands of diapausing pupae of *Manduca sexta* 120, 131
- Smits, Allan W.** Accessory lymph sacs and body fluid partitioning in the lizard, *Sauromalus hispidus* 121, 165
- Sorenson, A. L.** See BEIRÃO and SORENSON
- Spedding, G. R.** The wake of a jackdaw (*Corvus monedula*) in slow flight 125, 287
- Stephens, Philip J.** The fused thoracic-abdominal ganglion of the hermit crab (*Pagurus pollicaris*): neuromuscular relationships in the thoracic and abdominal flexor muscles 123, 201  
—Electrical and chemical synapses between giant interneurons and giant flexor motor neurones of the hermit crab (*Pagurus pollicaris*) 123, 217
- Stephenson, R., Butler, P. J. and Woakes, A. J.** Diving behaviour and heart rate in tufted ducks (*Aythya fuligula*) 126, 341
- Stevens, E. Don.** See HOHTOLA and STEVENS
- Suzuki, K.** See PETERSEN, FINDLAY, SUZUKI and DUNNE
- Tan, Y. P.** See MARTY, EVANS, TAN and TRAUTMANN
- Tang, Twen Poh and Macmillan, David L.** The effect of sensory manipulation upon interlimb coordination during fast walking in the cockroach 125, 107
- Tateda, Hideki.** See MIZUNAMI and TATEDA  
—See also YAMANA, TOH and TATEDA
- Tautz, Jürgen and Hamm, Iris.** Interneurons sensitive to water vibrations in the second abdominal ganglion of the crayfish 126, 525
- Taylor, C. Richard.** See BIEWENER and TAYLOR
- Taylor, E. W.** See MORRIS, TYLER-JONES and TAYLOR  
—See also MORRIS, TYLER-JONES, BRIDGES and TAYLOR
- Taylor, H. H.** See BUTT and TAYLOR  
—See also WELLS, FORSTER, DAVISON, TAYLOR, DAVIE and SATCHELL

- ter Maat, Andries.** See FERGUSON, PARSONS, TER MAAT and PINSKER
- Thompson, C. S.** See LOCOCO, THOMPSON and TOBE
- Thompson, J. L.** See SHUTTLEWORTH and THOMPSON
- Thompson, Karen J.** Oviposition digging in the grasshopper. I. Functional anatomy and motor programme 122, 387  
—Oviposition digging in the grasshopper. II. Descending neural control 122, 413
- Tobe, S. S.** See LOCOCO, THOMPSON and TOBE
- Toh, Yoshihiro.** See OHYAMA and TOH  
—See also YAMANA, TOH and TATEDA
- Trautmann, A.** See MARTY, EVANS, TAN and TRAUTMANN
- Trautmann, Alain.** See NEYTON and TRAUTMANN
- Treherne, J. E.** See SCHOFIELD and TREHERNE
- Truman, James W.** See DOMINICK and TRUMAN  
—See also WEEKS and TRUMAN
- Tsien, R. W.** See MCCLESKEY, FOX, FELDMAN and TSIENT
- Tsin, Andrew T. C. and Flores, Janie M.** The *in vivo* regeneration of goldfish rhodopsin and porphyropsin 122, 269
- Tyler-Jones, R.** See MORRIS, TYLER-JONES and TAYLOR  
—See also MORRIS, TYLER-JONES, BRIDGES and TAYLOR
- Usherwood, P. N. R.** See DUCE and USHERWOOD
- Villegas, Jorge.** See REALE, EVANS and VILLEGAS
- Vitalis, Timothy Z. and Milsom, William K.** Pulmonary mechanics and the work of breathing in the semi-aquatic turtle, *Pseudemys scripta* 125, 137  
—Mechanical analysis of spontaneous breathing in the semi-aquatic turtle, *Pseudemys scripta* 125, 157
- Vogeler, S.** See PÖRTNER, VOGELER and GRIESHABER
- von Seckendorff Hoff, Karin and Wassersug, Richard Joel.** The kinematics of swimming in larvae of the clawed frog, *Xenopus laevis* 122, 1
- Wainwright, Peter C.** Motor correlates of learning behaviour: feeding on novel prey by pumpkinseed sunfish (*Lepomis gibbosus*) 126, 237
- Walcott, Benjamin.** See KUTERBACH and WALCOTT
- Warner, G. F.** See ABBY-KALIO and WARNER
- Washio, Hiroshi.** Spontaneous miniature potentials in denervated coxal muscle fibres of the American cockroach 120, 143
- Wassersug, Richard Joel.** See VON SECKENDORFF HOFF and WASSERSUG
- Watt, P. W.** See HEAP, WATT and GOLDSPIK
- Webb, C. L.** See FUNK, WEBB and MILSOM
- Webber, D. M. and O'Dor, R. K.** Monitoring the metabolic rate and activity of free-swimming squid with telemetered jet pressure 126, 205
- Weeks, Janis C. and Truman, James W.** Hormonally mediated reprogramming of muscles and motoneurons during the larval-pupal transformation of the tobacco hornworm, *Manduca sexta* 125, 1
- Weiland, G., Bässler, U. and Brunner, M.** A biological feedback control system with electronic input: the artificially closed femur-tibia control system of stick insects 120, 369
- Wells, J.** See WELLS and WELLS
- Wells, M. J. and Wells, J.** Blood flow in acute hypoxia in a cephalopod 122, 345
- Wells, R. M. G., Forster, M. E., Davison, W., Taylor, H. H., Davie, P. S. and Satchell, G. H.** Blood oxygen transport in the free-swimming hagfish, *Eptatretus cirrhatus* 123, 43
- Wendelaar Bonga, Sjoerd E.** See FLIK, FENWICK, KOYAR, MAYER-GOSTAN and WENDELAAR BONGA
- Westby, G. W. Max and Partridge, Karen J.** Human homing: still no evidence despite geomagnetic controls 120, 325
- Westphal, James A.** See KIRSCHVINK, DIZON and WESTPHAL
- Wheatly, Michèle, McMahon, Brian R., Burggren, Warren W. and Pinder, Alan W.** Haemolymph acid-base, electrolyte and gas status during sustained voluntary activity in the land hermit crab (*Coenobita compressus*) 125, 225
- Whittembury, Guillermo, Biondi, Angela C., Paz-Aliaga, Azael, Linares, Henry, Parthe, Valentín and Linares, Nancy.** Transcellular and paracellular flow of water during secretion in the upper segment of the Malpighian tubule of *Rhodnius prolixus*: solvent drag of molecules of graded size 123, 71

- Wilkes, P. R. H. and McMahon, B. R.** Responses of a stenohaline freshwater teleost (*Catostomus commersoni*) to hypersaline exposure. I. The dependence of plasma pH and bicarbonate on electrolyte regulation 121, 77
- Responses of a stenohaline freshwater teleost (*Catostomus commersoni*) to hypersaline exposure. II. Transepithelial flux of sodium, chloride and 'acidic equivalents' 121, 95
- Woakes, A. J.** See STEPHENSON, BUTLER and WOAKES
- Woakes, A. J. and Butler, P. J.** Respiratory, circulatory and metabolic adjustments during swimming in the tufted duck, *Aythya fuligula* 120, 215
- Wokoma, Alele.** See JOHNSTON and WOKOMA
- Wong, A.** See GOVIND, MEAROW and WONG
- Wood, Chris M.** See MILLIGAN and WOOD
- Wood, Chris M., Boutilier, R. G. and Randall, D. J.** The physiology of dehydration stress in the land crab, *Cardisoma carnifex*: respiration, ionoregulation, acid-base balance and nitrogenous waste excretion 126, 271
- Wootton, R. J.** See NEWMAN and WOOTTON
- Wright, Patricia, Heming, Tom and Randall, David.** Downstream pH changes in water flowing over the gills of rainbow trout 126, 499
- Wright, Stephen, H. and Secomb, Timothy W.** Epithelial amino acid transport in marine mussels: role in net exchange of taurine between gills and sea water 121, 251
- Yamaguchi, K.** See NGUYEN PHU, YAMAGUCHI, SCHEID and PIIPER
- Yamana, Kenjiro, Toh, Yoshihiro and Tateda, Hideki.** Electrophysiological studies on the temporal organ of the Japanese house centipede, *Thereuonema hilgendorfi* 126, 297
- Yoshioka, K.** See JESSELL, YOSHIOKA and JAHR

## INDEX OF SUBJECTS

**Absorption:**

Of hyperosmotic fluid by the distal tubules of onychophoran nephridia (CAMPIGLIA and MADDRELL) 121, 43

—Of glucose, by the *in vitro* perfused midgut of the blue crab (CHU) 123, 325

**Acetylcholine:**

Role in activation of  $\text{Ca}^{2+}$ -dependent channels in rat lacrimal glands (MARTY, EVANS, TAN and TRAUTMANN) 124, 15

—Role in neuromuscular transmission in the leech heart (CALABRESE and MARANTO) 125, 205

**Acid-base regulation:**

By *Catostomus commersoni* in hypersaline conditions (WILKES and MCMAHON) 121, 77, 95

—By the lizard, during environmental hypercapnia (GLASS and HEISLER) 122, 13

—During recovery from hypoxia in an intertidal worm (PÖRTNER, VOGELER and GRIESHABER) 122, 51

—After exhaustive exercise in rainbow trout (MILLIGAN and WOOD) 123, 93, 123

—By dogfish pups *in utero* (KORMANIK and EVANS) 125, 173

—By the land hermit crab during exercise (WHEATLY, MCMAHON, BURGGREN and PINDER) 125, 225

—In carp during environmental hypercapnia (CLAIBORNE and HEISLER) 126, 41

—In land crabs subjected to dehydration (WOOD, BOUTILIER and RANDALL) 126, 271

**Acid excretion:**

After exhaustive exercise in rainbow trout (MILLIGAN and WOOD) 123, 93, 123

**Acidosis:**

Effect on intracellular pH of the perfused heart of rainbow trout (FARRELL and MILLIGAN) 125, 347

**Acoustic axis:**

Of the external ear of the Tammar wallaby (COLES and GUPPY) 121, 371

**Action potentials:**

Two types in a secretory epithelium of a clam mantle (BEIRÃO and SORENSON) 121, 179

—Associated with contraction in a heliozoan (FEBVRE-CHEVALIER, BILBAUT, BONE and FEBVRE) 122, 177

—In *Rhodnius* oocyte membranes (O'DONNELL) 126, 119

**Adaptation:**

Of *Paramecium* to changes in external potassium concentration (OKA, NAKAOKA and OOSAWA) 126, 111

**Aerodynamics:**

Of dragonfly flight (ALEXANDER) 122, 81

—Of bat flight (ALDRIDGE) 126, 479

**Alanine:**

Stimulates net water flux across the intestine of the seawater eel (ANDO, SASAKI and HUANG) 122, 257

***Alpheus heterochelis*:**

Regeneration of fibre types in paired, asymmetric closer muscles (GOVIND, MEAROW and WONG) 123, 55

**Amiloride:**

Effect on sodium flux and transbranchial potentials in perfused crab gill preparations (LUCU and SIEBERS) 122, 25

**Amines:**

Modulation of insect skeletal muscle by (EVANS and MYERS) 124, 143

**Amino acids:**

As neurotransmitters at primary afferent synapses in rat spinal cord (JESSELL, YOSHIOKA and JAHR) 124, 239

**Amino acid transport:**

In marine mussels: role in net exchange of taurine between gills and sea water (WRIGHT and SECOMB) 121, 251

**Ammonia excretion:**

In carp during environmental hypercapnia (CLAIBORNE and HEISLER) 126, 41

**Amphibia:**

*Rana catesbeiana*, effect of experimental ventilation of the skin on cutaneous gas exchange (BURGGREN and FEDER) 121, 445

—*Rana catesbeiana*, distribution of pulmocutaneous blood flow (BOUTILIER, GLASS and HEISLER) 126, 33

**Anaerobic metabolism:**

Recovery from, in the intertidal worm, *Sipunculus nudus* (PÖRTNER, VOGELER and GRIESHABER) 122, 37, 51

**Antarctic fish:**

Energy cost of contraction in isolated muscle fibres (ALTRINGHAM and JOHNSTON) 121, 239

***Apis mellifera*:**

Iron-containing cells in the fat body (KUTERBACH and WALCOTT) 126, 375, 389

***Aplysia*:**

Spontaneous and elicited bag cell discharges in *Aplysia* (FERGUSON, PARSONS, TER MAAT and PINSKER) 123, 159

—Modulation of the serotonin-sensitive potassium channel (SIEGELBAUM, BELARDETTI, CAMARDO and SHUSTER) 124, 287

—Modulation of ion channels by intracellular messengers, in an identified neurone (LOTSHAW, LEVITAN and LEVITAN) 124, 307

—Regulation of neuronal ion channels (KACZMAREK) 124, 375

—Inhibition of an intestinal chloride pump (GERENCSEI) 125, 391

***Ariolimax columbianus*:**

Role of the epithelial channel cells of the body wall in slime secretion (MARTIN and DEYRUP-OLSEN) 121, 301

**Arterial pressure:**

No effect on glomerular filtration in hagfish (RIEGEL) 126, 361

**Autotomy:**

Induction of evisceration in the holothurian *Eupentacta quinquesemita* (BYRNE) 120, 25

**Axon guidance:**

During development of dorsal root ganglion neurones (DODD and JESSELL) 124, 225

**Bag cells:**

Electrical discharges from, in gonadectomized *Aplysia* (FERGUSON, PARSONS, TER MAAT and PINSKER) 123, 159

**Barostatic reflex:**

In the sea raven, *Hemitripterus americanus* (FARRELL) 122, 65

**Bats:**

Flight physiology of intermediate-sized fruit bats (CARPENTER) 120, 79

—Kinematics and aerodynamics of flight (ALDRIDGE) 126, 479

**Beetles:**

Respiration beneath desert sand, carbon dioxide diffusion and respiratory patterns (LOUW, NICOLSON and SEELY) 120, 443

**Behaviour:**

Cricket eye cleaning, intracellular recordings from neck muscle motoneurons (HENSLEY) 120, 153

—Physiology of wandering in *Manduca sexta* larvae (DOMINICK and TRUMAN) 121, 115, 133

—Motion of magnetotactic microorganisms (ESQUIVEL and LINS DE BARROS) 121, 153

—Effects of sensory input to the *Lymnaea* feeding system (KEMENES, ELLIOTT and BENJAMIN) 122, 113

—Of diving tufted ducks (STEPHENSON, BUTLER and WOAKES) 126, 341

**Bimodal respiration:**

In *Rana catesbeiana* (BOUTILIER, GLASS and HEISLER) 126, 33

—In *Rana pipiens* (PINDER and BURGGREN) 126, 453

**Binocular coordination:**

During prey capture in the praying mantis (ROSSEL) 120, 265

**Bioenergetics:**

Of jet propulsion in squid (WEBBER and O'DOR) 126, 205

**Biomechanics:**

Of the mandibular system of *Carcinus maenas* (ABBY-KALIO and WARNER) 125, 309

**Blood-brain barrier:**

Of *Periplaneta americana*, octopamine sensitivity (SCHOFIELD and TREHERNE) 123, 423

**Blood flow:**

In *Octopus*, effects of acute hypoxia (WELLS and WELLS) 122, 345

—To lungs and skin in *Rana catesbeiana* (BOUTILIER, GLASS and HEISLER) 126, 33

**Blood gases:**

Effect of diving in *Xenopus laevis* (BOUTILIER and SHELTON) 122, 209

—In free-swimming hagfish (WELLS, FORSTER, DAVISON, TAYLOR, DAVIE and SATCHELL) 123, 43

—During exercise in the land hermit crab (WHEATLY, MCMAHON, BURGGREN and PINDER) 125, 225

—In exercising fowl in normoxia and hypoxia (BRACKENBURY) 126, 423

**Blood pressure:**

Of cod, control during exercise (AXELSSON and NILSSON) 126, 225

**Blood respiratory properties:**

In *Xenopus*, during voluntary and enforced dives (BOUTILIER and SHELTON) 121, 285

**Bobolink:**

Natural and induced magnetization of the head (BEASON and BRENNAN) 125, 49

**Body mass:**

Influence on endurance to restrained submersion in the Pekin duck (HUDSON and JONES) 120, 351

**Bohr coefficient:**

For blood of free-swimming tuna (JONES, BRILL and MENSE) 120, 201

**Bone geometry:**

Role in determination of gait and speed (BIEWENER and TAYLOR) 123, 383

**Bone strain:**

Role in determination of gait and speed (BIEWENER and TAYLOR) 123, 383

**Bradycardia:**

In diving tufted ducks (STEPHENSON, BUTLER and WOAKES) 126, 341

**Brain:**

Properties and roles of three subclasses of histamine receptors (SCHWARTZ, ARRANG, GARBARG and KORNER) 124, 203

—Release of FMRFamide-like immunoreactivity in *Manduca sexta* (CARROLL, CARROW and CALABRESE) 126, 1

**Breathing pattern:**

Regulation of, in the turtle (VITALIS and MILSOM) 125, 157

**8-Bromo-cyclic-AMP:**

Effect on calcium channel currents in rat myocytes (REUTER, KOKUBUN and PROD'HOM) 124, 191

**Bushcricquet:**

Muscle activity during stridulation (HELLER) 126, 97

**Calcium:**

Role in the control of orientation of cilia in *Paramecium caudatum* (NOGUCHI, INOUE and KUBO) 120, 105

—Effects of low ambient levels on flux rates and internal pools in a teleost fish (FLIK, FENWICK, KOLAR, MAYER-GOSTAN and WENDELAAR BONGA) 120, 249

—Interaction with L-lactate in regulation of haemocyanin oxygen affinity during emersion of crayfish (MORRIS, TYLER-JONES and TAYLOR) 121, 315; (MORRIS, TYLER-JONES, BRIDGES and TAYLOR) 121, 327

—Intracellular, free calcium in snail salivary gland measured with ion-selective microelectrodes (BARBER) 121, 395

—Effect on viscosity of catch connective tissue in sea cucumber (HAYASHI and MOTOKAWA) 125, 71

—Effect on mechanical properties of the perfused heart of rainbow trout (FARRELL, MACLEOD and CHANCEY) 125, 319

**Calcium channels:**

In peptidergic nerve terminals, role in control of hormone release (LEMONS and NORDMANN) 124, 53

—Multiple types of (McCLESKEY, FOX, FELDMAN and TSIEH) 124, 177

—In cardiac cells, properties and modulation of (REUTER, KOKUBUN and PROD'HOM) 124, 191

—In *Aplysia* neurones, regulation of (KACZMAREK) 124, 375

—In *Manduca sexta* prothoracic glands (EUSEBIO and MOODY) 126, 531

**Calcium-dependent channels:**

In rat lacrimal glands, activation by acetylcholine (MARTY, EVANS, TAN and TRAUTMANN) 124, 15

**Carbon dioxide receptor:**

Temporal organ of the Japanese house centipede (YAMANA, TOH and TATEDA) 126, 297

**Carbonic anhydrase:**

At the gill surface in *Salmo gairdneri* (WRIGHT, HEMING and RANDALL) 126, 499

**Cardiac output:**

During vascular compression in the sea raven (FARRELL) 122, 65

**Cardiac performance:**

In *Busycon canaliculatum*, in response to loading pressure and 5-hydroxytryptamine (SMITH and HILL) 123, 243

**Carp:**

*Cyprinus carpio*, changes in myofibrillar ATPase in response to environmental temperature (HEAR, WATT and GOLDSPIK) 123, 373

—Effects of hypercapnia on acid-base regulation and ion transfers (CLAIBORNE and HEISLER) 126, 41

**Catch connective tissue:**

In the holothurian body wall, effects of ionic environment on viscosity (HAYASHI and MOTOKAWA) 125, 71

**Catecholamines:**

Role in erythrocyte pH regulation and oxygen transport in *Salmo gairdneri* during exercise (PRIMMETT, RANDALL, MAZEAUD and BOUTILIER) 122, 139

—Promotion of release in rainbow trout by acute acidosis (BOUTILIER, IWAMA and RANDALL) 123, 145

—In plasma of dogfish and rainbow trout at rest and during exercise (BUTLER, METCALFE and GINLEY) 123, 409

—Effect on mechanical properties of the perfused heart of rainbow trout (FARRELL, MACLEOD and CHANCEY) 125, 319

—Effect on intracellular pH of the perfused heart of rainbow trout (FARRELL and MILLIGAN) 125, 347

***Catostomus commersoni*:**

Response to hypersaline exposure (WILKES and McMAHON) 121, 77, 95

**Cell coupling:**

Between parenchymal cells in the cockroach corpora allata (LOCOCO, THOMPSON and TOBE) 121, 407

**Cell motion:**

Of magnetotactic microorganisms (ESQUIVEL and LINS DE BARROS) 121, 153

**Cell proliferation:**

Regulation of (MOOLENAAR, DEFIZE and DE LAAT) 124, 359

**Central pattern generator:**

Role in the initiation of leech swimming (NUSBAUM and KRISTAN) 122, 277; (NUSBAUM) 122, 303

—For oviposition digging in the grasshopper (THOMPSON) 122, 387, 413

**Centrarchidae:**

Learning behaviour when feeding on novel prey (WAINWRIGHT) 126, 237

**Cephalopod:**

Effects of acute hypoxia on blood flow in *Octopus* (WELLS and WELLS) 122, 345

—Neural correlates of colour change in *Sepia* (MESSENGER and MIYAN) 125, 395

**Cetaceans:**

Strandings, evidence for geomagnetic sensitivity (KIRSCHVINK, DIZON and WESTPHAL) 120, 1

 **$\omega$ -CgTX:**

A neurotoxin from *Conus geographus*, used to distinguish between different types of calcium channel (McCLESKEY, FOX, FELDMAN and TSIEH) 124, 177

**Channel cells:**

In the body wall of a terrestrial slug, role in slime secretion (MARTIN and DEYRUP-OLSEN) 121, 301

**Chemoreception:**

In sea anemones (BOOTHBY and MCFARLANE) 125, 385

**Chicken:**

Kinetics of oxygen uptake and release in erythrocytes (NGUYEN PHU, YAMAGUCHI, SCHEID and PIPER) 125, 15

—Effect of exercise on respiration (BRACKENBURY) 126, 423

**Chloride transport:**

Inhibition of, in the intestine of *Aplysia californica* (GERENCSEI) 125, 391

**Chromatic opponency:**

Of locust vision (OSORIO) 122, 193

**Chromatophores:**

Localization and stimulation of brain motoneurons in the squid (DUBAS, HANLON, FERGUSON and PINSKER) 121, 1

**Cilia:**

Orientation of, in *Paramecium caudatum* (NOGUCHI, INOUE and KUBO) 120, 105

**Clam mantle:**

Two types of action potential in a secretory epithelium (BEIRAO and SORENSON) 121, 179

**Cloacal function:**

In marine birds, role in adaptation to sea water (GOLDSTEIN, HUGHES and BRAUN) 123, 345

**Cockroach:**

Intercellular communication in the corpora allata (LOCOCO, THOMPSON and TOBE) 121, 407

—Patch-clamp recording of potassium channels in glial cells (LEECH) 122, 443

—Octopamine sensitivity of the blood-brain barrier (SCHOFIELD and TREHERNE) 123, 423

—Classification of ocellar interneurons in the brain (MIZUNAMI and TATEDA) 125, 57

—Effects of sensory manipulation on interlimb coordination during fast walking (TANG and MACMILLAN) 125, 107

—Multimodality of ocellar interneurons (OHYAMA and TOH) 125, 405

**Cod:**

Detection of infrasound by (SAND and KARLSEN) 125, 197

—Control of blood pressure during exercise (AXELSSON and NILSSON) 126, 225

**Colloid osmotic pressure:**

Measurement on microlitre and sub-microlitre volumes (RIEGEL) 122, 433

—In glomeruli and renal vasculature of the hagfish (RIEGEL) 123, 359



**Colour:**

Correlation of iridescence with changes in iridophore platelet ultrastructure in the squid (COOPER and HANLON) 121, 451

—Neural control of changes, in cuttlefish (MESSENGER and MIYAN) 125, 395

**Command elements:**

Of the sensorimotor system in crayfish (JELLIES and LARIMER) 120, 173

**Command neurones:**

In oviposition digging behaviour in the grasshopper (THOMPSON) 122, 413

**Conduction block:**

In the giant axons of a sabellid worm (HIGUCHI, NAKAMURA, SAWAUCHI and OKUMURA) 126, 433

**Connective tissue:**

Role in evisceration of the holothurian *Eupentacta quinquesemita* (BYRNE) 120, 25

**Contractile properties:**

Effect of temperature and thermal acclimation on flounder skeletal muscle (JOHNSTON and WOKOMA) 120, 119

—Thermal dependence of lizard muscle performance (MARSH and BENNETT) 126, 63, 79

**Contraction:**

Of the heliozoan, *Actinocoryne contractilis*, electrophysiology of (FEBVRE-CHEVALIER, BILBAUT, BONE and FEBVRE) 122, 177

**Control of breathing:**

Relationship between lung volume, respiratory drive and breathing pattern in a turtle (MILSOM and CHAN) 120, 233

**Corpus allatum:**

Low-resistance intercellular pathways, in the cockroach (LOCOCO, THOMPSON and TOBE) 121, 407

**Cost of locomotion:**

For a hermit crab carrying a shell (HERREID and FULL) 120, 297

**Crab:**

*Carcinus maenas*, amiloride-sensitive sodium flux and transbranchial potentials (LUCU and SIEBERS) 122, 25

—*Pagurus pollicaris*, neuromuscular relationships and synapses in the thoracic and abdominal flexor muscles (STEPHENS) 123, 201, 217

—*Callinectes sapidus*, glucose transport by the midgut *in vitro* (CHU) 123, 325

—Structure and function of the mandibular system of *Carcinus maenas* (ABBY-KALIO and WARNER) 125, 309

—*Cardisoma carnifex*, physiology of dehydration (WOOD, BOUTILIER and RANDALL) 126, 271

**Crayfish:**

Activity of abdominal-positioning interneurons during movement of *Procambarus clarkii* (JELLIES and LARIMER) 120, 173

—Aspects of sensory integration in the swimmeret system (HEITLER) 120, 387

—Interactions of the segmental giant interneurone with the abdominal fast flexor and swimmeret motor neurones (HEITLER and DARRIG) 121, 55

—Regulation of haemocyanin oxygen affinity during emersion (MORRIS, TYLER-JONES and TAYLOR) 121, 315; (MORRIS, TYLER-JONES, BRIDGES and TAYLOR) 121, 327

—Two mechanisms determining leg coordination in walking (CRUSE and MÜLLER) 121, 349

—Cuticular stress detector (CSD2) (KLÄRNER and BARTH) 122, 149; KLÄRNER and BARNES) 122, 161

—Spectral sensitivity of the eye (BRYCESON) 125, 401

—Slow active potentials in walking-leg motor neurones (SILLAR and HEITLER) 126, 445

—Interneurones sensitive to water vibration (TAUTZ and HAMM) 126, 525

**Cricket:**

Organization and role during locomotion of the proximal musculature of the foreleg (LAURENT and RICHARD) 123, 255, 285

**Crustacea:**

Diurnal changes in the compound eye of *Ligia exotica* (HARIYAMA, MEYER-ROCHOW and EGUCHI) 123, 1

—Swimmeret proprioceptors in lobsters (NEIL and MIYAN) 126, 157; (MIYAN and NEIL) 126, 181

**Cutaneous gas exchange:**

In the bullfrog, effect of experimental ventilation of the skin (BURGGREN and FEDER) 121, 445

**Cuticle:**

Water loss through, evidence against hormonal control in the cockroach (MACHIN, O'DONNELL and KESTLER) 121, 339

—Stress detector in the crayfish (KLÄRNER and BARTH) 122, 149; (KLÄRNER and BARNES) 122, 161

**Cuttlefish:**

Neural correlates of colour change in *Sepia officinalis* (MESSENGER and MIYAN) 125, 395

**Cyclic AMP:**

- Role in control of rectal gland secretion in the dogfish (ERLIJ and RUBIO) 122, 99
- Release in response to stimulation of histamine receptors in brain (SCHWARTZ, ARRANG, GARBARG and KORNER) 124, 203
- Role in modulation of the potassium channel in *Aplysia* sensory neurones (SIEGELBAUM, BELARDETTI, CAMARDO and SHUSTER) 124, 287
- An intracellular modulator of neuronal activity in *Aplysia* (LOTSHAW, LEVITAN and LEVITAN) 124, 307

**Decapitation:**

- Effect on water loss from adult male cockroaches (MACHIN, O'DONNELL and KESTLER) 121, 339

**Deer mice:**

- Seasonal limits to thermoregulation (CONLEY and PORTER) 126, 249

**Defence:**

- In *Torpedo marmorata*, role of electric organ discharge (BELBENOIT) 121, 179

**Dehydration:**

- Physiology of, in land crabs (WOOD, BOUTILIER and RANDALL) 126, 271

**Denervation:**

- Of cockroach coxal muscle fibres, functional changes (WASHIO) 120, 143

**Development:**

- In lobsters, of neurones containing peptide and amine cotransmitters (BELTZ and KRAVITZ) 124, 115
- Possible recognition signals in sensory neurone development (DODD and JESSELL) 124, 225
- Accumulation of iron-containing cells in the fat body of the honey-bee (KUTERBACH and WALCOTT) 126, 389

**Diacylglycerol:**

- Role in the regulation of ion channels (BERRIDGE) 124, 323
- As an intracellular messenger in clonal pituitary cells (DRUMMOND) 124, 337

**Diapause:**

- Cellular changes in the prothoracic glands of *Manduca sexta* pupae (SMITH, BOWEN, BOLLENBACHER and GILBERT) 120, 131

**Diffusion:**

- Of oxygen and metabolites from capillaries to mitochondria in rat myocardium after exercise training (KAYAR, CONLEY, CLAASSEN and HOPPELER) 120, 189

- Capacity, for oxygen, of the gills of *Scyliorhinus stellaris* (PIPER, SCHEID, PERRY and HUGHES) 123, 27

**1,4-Dihydropyridines:**

- Effect on gating of calcium channels in rat cardiac cells (REUTER, KOKUBUN and PROD'HOM) 124, 191

**Distance estimation:**

- In prey capture by a stick insect (CLOAREC) 120, 59

**Diving:**

- Forced, influence of body mass on endurance in the Pekin duck (HUDSON and JONES) 120, 351
- Contribution of nasal receptors to cardiac response in ducks (FURILLA and JONES) 121, 227
- Aerobic and anaerobic, effects on respiratory properties of *Xenopus* blood (BOUTILIER and SHELTON) 121, 285
- Effect on ventilation, blood gases and pH in *Xenopus laevis* (BOUTILIER and SHELTON) 122, 209
- Effect on gas exchange and oxygen storage and transport in *Xenopus laevis* (BOUTILIER and SHELTON) 126, 133
- And heart rate in tufted ducks (STEPHENSON, BUTLER and WOAKES) 126, 341

**Dogfish:**

- Scyliorhinus stellaris*, morphometry of the gills in relation to body size (HUGHES, PERRY and PIPER) 121, 27
- Acid-base status of *Squalus acanthias* pups *in utero* (KORMANIK and EVANS) 125, 173
- Scyliorhinus canicula*, perfusion-secretion relationships in the rectal gland (SHUTTLEWORTH and THOMPSON) 125, 373

**Dopamine:**

- Role in modulation of the calcium current of molluscan neurones (GERSCHENFELD, HAMMOND and PAUPARDIN-TRITSCH) 124, 73

**Dorsal root ganglion neurones:**

- Formation of specific sensory connections during development (DODD and JESSELL) 124, 225

**Dragonfly:**

- Wind tunnel studies of flying turns (ALEXANDER) 122, 81
- The mechanics of wing pleating (NEWMAN and WOOTTON) 125, 361

**Duck:**

- Respiratory, circulatory and metabolic adjustments during swimming in *Aythya fuligula* (WOAKES and BUTLER) 120, 215

- Influence of body mass on the endurance to restrained submersion in *Anas platyrhynchos* (HUDSON and JONES) 120, 351
- Aythya americana* and *Anas platyrhynchos*, contribution of nasal receptors to cardiac response in diving (FURILLA and JONES) 121, 351
- Kinetics of oxygen uptake and release in erythrocytes (NGUYEN PHU, YAMAGUCHI, SCHEID and PIIPER) 125, 15
- Diving behaviour and heart rate in *Aythya fuligula* (STEPHENSON, BUTLER and WOAKES) 126, 341

**Ecdysone:**

- Synthesis of, in diapausing pupae of *Manduca sexta* (SMITH, BOWEN, BOLLENBACHER and GILBERT) 120, 131
- Induction of wandering behaviour in the isolated *Manduca sexta* nervous system (DOMINICK and TRUMAN) 121, 115, 133
- Role in larval–pupal transformation of *Manduca sexta* (WEEKS and TRUMAN) 125, 1

**Eel:**

- A new technique for measuring water transport across the intestine (ANDO, SASAKI and HUANG) 122, 257

**Egg laying:**

- Spontaneous and elicited bag cell discharges in gonadectomized *Aplysia* (FERGUSON, PARSONS, TER MAAT and PINSKER) 123, 159

**Elasmobranchs:**

- Control of rectal gland secretion in *Squalus acanthias* (ERLUJ and RUBIO) 122, 99
- Effective and morphometric oxygen-diffusing capacity of the gills of *Scyliorhinus stellaris* (PIIPER, SCHEID, PERRY and HUGHES) 123, 27
- Perfusion–secretion relationships in the isolated rectal gland (SHUTTLEWORTH and THOMPSON) 125, 373

**Electric organ discharge:**

- In predation and defence of *Torpedo marmorata* (BELBENOIT) 121, 197

**Electrolytes:**

- Regulation of, in hypersaline conditions, by a stenohaline, freshwater teleost (WILKES and MCMAHON) 121, 77, 95
- Status in blood of land hermit crab during exercise (WHEATLY, MCMAHON, BURGGREN and PINDER) 125, 225
- In the mandibular saliva of the red kangaroo (BEAL) 126, 315

**Electro-osmometer:**

- For measurements on microlitre and sub-microlitre volumes (RIEGEL) 122, 433

**Electrophysiology:**

- Of chromatophore motoneurons in the squid brain (DUBAS, HANLON, FERGUSON and PINSKER) 121, 1
- Of the cockroach blood–brain barrier (SCHOFIELD and TREHERNE) 123, 423

**Emersion:**

- Of crayfish, regulation of haemocyanin oxygen affinity (MORRIS, TYLER-JONES and TAYLOR) 121, 315; (MORRIS, TYLER-JONES, BRIDGES and TAYLOR) 121, 327

**Energetics:**

- Of hermit crabs, the cost of carrying a shell (HERREID and FULL) 120, 297
- Of muscle contraction in fibres isolated from an Antarctic fish (ALTRINGHAM and JOHNSTON) 121, 239
- Of thermal acclimation on a lungless salamander (FEDER) 121, 271
- Of free-ranging hover-feeding in Anna hummingbirds (BARTHOLOMEW and LIGHTON) 123, 191

**Epithelia:**

- Amino acid transport in marine mussels (WRIGHT and SECOMB) 121, 251
- Role of the channel cells of the slug body wall in slime secretion (MARTIN and DEYRUP-OLSEN) 121, 301
- Paracellular water flow during secretion in *Rhodnius prolixus* Malpighian tubules (WHITTEMBURY, BIONDI, PAZ-ALIAGA, LINARES, PARTHE and LINARES) 123, 71

**Epithelial excitability:**

- Two types of action potential in the secretory epithelium in clam mantle (BEIRÃO and SORENSON) 121, 179

**Eptatretus cirrhatus:**

- Blood oxygen transport in (WELLS, FORSTER, DAVISON, TAYLOR, DAVIE and SATCHELL) 123, 43

**Eptatretus stouti:**

- Hydrostatic pressures in glomeruli and renal vasculature (RIEGEL) 123, 359
- No arterial pressure effect on glomerular filtration (RIEGEL) 126, 361

**Equilibrium reactions:**

- Of the Norway lobster (NEIL and MIYAN) 126, 157

**Evisceration:**

- Induction of, in the holothurian *Eupentacta quinquesemita* (BYRNE) 120, 25

**Excitation-contraction coupling:**

Possible role for inositol trisphosphate (BERRIDGE) 124, 323

**Excretion:**

In the spider, effects of feeding upon hydrated animals (BUTT and TAYLOR) 125, 85

—Of ammonia, by dogfish pups *in utero* (KORMANIK and EVANS) 125, 173

**Exercise:**

Capillarity and mitochondrial distribution in rat myocardium after training (KAYAR, CONLEY, CLAASSEN and HOPPELER) 120, 189

—Effect of catecholamines on erythrocyte pH regulation and oxygen transport in *Salmo gairdneri* (PRIMMETT, RANDALL, MAZEAUD and BOUTILIER) 122, 139

—Exhaustive, in *Salmo gairdneri*, acid-base status (MILLIGAN and WOOD) 123, 93, 123

—Effect on plasma catecholamines in dogfish and rainbow trout (BUTLER, METCALFE and GINLEY) 123, 409

—Voluntary, in the land hermit crab, haemolymph acid-base, electrolyte and gas status (WHEATLY, MCMAHON, BURGGREN and PINDER) 125, 225

—Control of blood pressure in cod (AXELSSON and NILSSON) 126, 225

—Effect on blood gases and respiratory pattern in exercising fowl (BRACKENBURY) 126, 423

**Exocrine glands:**

Muscarinic response in rat lacrimal gland (MARTY, EVANS, TAN and TRAUTMANN) 124, 15

—Messenger-mediated control of potassium channels (PETERSEN, FINDLAY, SUZUKI and DUNNE) 124, 33

**Eye:**

Diurnal changes of the structure and function, in *Ligia exotica* (HARIYAMA, MEYER-ROCHOW and EGUCHI) 123, 1

—Of the crayfish, spectral sensitivity of (BRYCESON) 125, 401

**Fat body:**

Of the honey-bee, iron-containing cells in (KUTERBACH and WALCOTT) 126, 375, 389

**Feedback oscillations:**

In the artificially closed femur-tibia control system of stick insects (WEILAND, BÄSSLER and BRUNNER) 120, 369

**Feeding:**

Of *Lymnaea*, effects of chemical and tactile inputs (KEMENES, ELLIOTT and BENJAMIN) 122, 113

—In *Tritonia*, morphology and physiology of small white neurones (DORSETT) 122, 237

—In spiders, effects on salt and water balance (BUTT and TAYLOR) 125, 85

—Structure and function of the mandibular system of *Carcinus maenas* (ABBY-KALIO and WARNER) 125, 309

—Role of chemoreception in sea anemones (BOOTHBY and MCFARLANE) 125, 385

—Aquatic prey capture in fishes (LAUDER) 125, 411

—Of *Lepomis gibbosus* on novel prey (WAINWRIGHT) 126, 237

**Femur-tibia control system:**

In stick insects, a biological feedback control system (WEILAND, BÄSSLER and BRUNNER) 120, 369

**Firefly lantern:**

Inactivation of octopamine by a high-affinity uptake mechanism (CARLSON and EVANS) 122, 369

—Release of octopamine from the photomotor neurones (CARLSON and JALENAK) 122, 453

**Flexor muscles:**

Neuromuscular relationships and synapses in the hermit crab (STEPHENS) 123, 201, 217

**Flight:**

Physiology of, for intermediate-sized fruit bats (CARPENTER) 120, 79

—Activity of a steering muscle in locusts (ELSON and PFLÜGER) 120, 421

—Aerodynamics of dragonfly turns (ALEXANDER) 122, 81

—Oxygen consumption during hover-feeding in free-ranging Anna hummingbirds (BARTHOLOMEW and LIGHTON) 123, 191

—Vorticity in the wake of a jackdaw (SPEDDING) 125, 287

—Mechanics of pleating in dragonfly wings (NEWMAN and WOOTTON) 125, 361

—Of the greater horseshoe bat (ALDRIDGE) 126, 479

**Fluid storage:**

In accessory lymph sacs in the lizard (SMITS) 121, 165

**FMRamide:**

Role in modulation of the calcium current of molluscan neurones (GERSCHENFELD, HAMMOND and PAUPARDIN-TRITSCH) 124, 73

- Localization and release in *Manduca sexta* neurohaemal organs (CARROLL, CARROW and CALABRESE) 126, 1
- Modulatory actions on locust skeletal muscle (EVANS and MYERS) 126, 403
- Force-velocity curves:**
  - Methods for fitting and comparing (MARSH and BENNETT) 126, 63
- Foreleg:**
  - Of the cricket, anatomy and innervation (LAURENT and RICHARD) 123, 255
- Of the cricket, electromyographic activity during stepping patterns (LAURENT and RICHARD) 123, 285
- Fracture:**
  - Of horse hoof keratin (BERTRAM and GOSLINE) 125, 29
- Frog:**
  - Ventilation and partitioning of oxygen uptake in *Rana pipiens* (PINDER and BURGGREN) 126, 453
- Fur:**
  - Properties of, role in seasonal limits to thermoregulation in deer mice (CONLEY and PORTER) 126, 249
- Gait:**
  - Role of bone strain in determination of (BIEWENER and TAYLOR) 123, 383
- Gap junction:**
  - Physiological modulation of permeability in rat lacrimal glands (NEYTON and TRAUTMANN) 124, 93
- Gas exchange:**
  - By lungs and skin in *Rana catesbeiana* (BOUTILIER, GLASS and HEISLER) 126, 33
- In *Xenopus laevis* diving voluntarily (BOUTILIER and SHELTON) 126, 133
- Geomagnetism:**
  - Effect on cetacean navigation (KIRSCHVINK, DIZON and WESTPHAL) 120, 1
- Lack of an effect on human navigation (WESTBY and PARTRIDGE) 120, 325
- Giant neurones:**
  - Anatomy and physiology of, in the hermit crab (HEITLER and FRASER) 125, 245
- In a sabellid worm, role in the withdrawal reflex (HIGUCHI, NAKAMURA, SAWAUCHI and OKUMURA) 126, 433
- Gills:**
  - In the dogfish, morphometry in relation to body size (HUGHES, PERRY and PIPER) 121, 27
- Epithelial amino acid transport in marine mussels (WRIGHT and SECOMB) 121, 251
- Of *Scyliorhinus stellaris*, effective and morphometric oxygen diffusing capacity (PIPER, SCHEID, PERRY and HUGHES) 123, 27
- Of rainbow trout, downstream pH changes (WRIGHT, HEMING and RANDALL) 126, 499
- Glia:**
  - Octopamine sensitivity of the blood-brain barrier in the cockroach (SCHOFIELD and TREHERNE) 123, 423
- Glial cell:**
  - Octopaminergic modulation of the membrane potential (REALE, EVANS and VILLEGAS) 121, 421
- Glomerular filtration:**
  - In the hagfish, *Eptatretus stouti* (RIEGEL) 123, 359; 126, 361
- Glucose transport:**
  - By the midgut of the blue crab (CHU) 123, 325
- Glutamate receptors:**
  - On cultured muscle cells from embryonic locusts (DUCE and USHERWOOD) 123, 307
- Goldfish:**
  - Carassius auratus*, *in vivo* regeneration of rhodopsin and porphyropsin (TSIN and FLORES) 122, 269
- Grasshopper:**
  - Oviposition digging behaviour (THOMPSON) 122, 387, 413
- Growth factor receptors:**
  - Ionic signalling by (MOOLENAAR, DEFIZE and DE LAAT) 124, 359
- Gryllus campestris:**
  - Intracellular recordings of neck muscle motoneurons during eye cleaning behaviour (HENSLEY) 120, 153
- Gulls:**
  - Role of the lower intestine in adaptation of *Larus glaucescens* to sea water (GOLDSTEIN, HUGHES and BRAUN) 123, 345
- Haemoconcentration:**
  - Of *Xenopus* blood during enforced diving (BOUTILIER and SHELTON) 121, 285
- Haemocyanin:**
  - Regulation of oxygen affinity during emersion of crayfish (MORRIS, TYLER-JONES and TAYLOR) 121, 315; (MORRIS, TYLER-JONES, BRIDGES and TAYLOR) 121, 327
- Haemodynamics:**
  - In the isolated dogfish rectal gland (SHUTTLEWORTH and THOMPSON) 125, 373

**Haemoglobin:**

Oxygen-carrying capacity of, interactions with red cell pH in acute acidosis in rainbow trout (BOUTILIER, IWAMA and RANDALL) 123, 145

**Hagfish:**

Blood oxygen transport in *Eptatretus cirrhatus* (WELLS, FORSTER, DAVISON, TAYLOR, DAVIE and SATCHELL) 123, 43

—Hydrostatic pressures in glomeruli and renal vasculature of *Eptatretus stouti* (RIEGEL) 123, 359

—No arterial pressure effect on glomerular filtration by *Eptatretus stouti* (RIEGEL) 126, 361

**Hearing:**

Biophysical aspects of, in the Tammar wallaby (COLES and GUPPY) 121, 371

**Heart:**

Capillarity and mitochondrial distribution in rat myocardium following exercise training (KAYAR, CONLEY, CLAASSEN and HOPPELER) 120, 189

—Response to loading pressure and 5-hydroxytryptamine in *Busycon canaliculatum* (SMITH and HILL) 123, 243

—Of the leech, role of acetylcholine in neuromuscular transmission (CALABRESE and MARANTO) 125, 205

—Perfused, in *Salmo gairdneri*, intrinsic mechanical properties (FARRELL, MACLEOD and CHANCEY) 125, 319

—Perfused, in *Salmo gairdneri*, intracellular pH (FARRELL and MILLIGAN) 125, 347

**Heartbeat:**

Influence of oxygen on the rhythm in the leech (DAVIS) 123, 401

**Heart muscle cells:**

Isolated from *Lymnaea stagnalis*, characterization of a potassium-selective channel (BREZDEN, MORRIS and GARDNER) 123, 175

**Heart rate:**

In redhead ducks during restrained and unrestrained diving (FURILLA and JONES) 121, 351

—In diving tufted ducks (STEPHENSON, BUTLER and WOAKES) 126, 341

**Heat loss:**

From deer mice (CONLEY and PORTER) 126, 249

**Heat production:**

Relationship with muscle electrical activity and tremor in shivering in the quail (HOHTOLA and STEVENS) 125, 119

**Heliozoan:**

Electrophysiology of contraction of *Actinocoryne contractilis* (FEBVRE-CHEVALIER, BILBAUT, BONE and FEBVRE) 122, 177

**Hermit crab:**

*Coenobita compressus*, locomotion on beach and treadmill (HERREID and FULL) 120, 283

—*Coenobita compressus*, the energetic cost of carrying a shell (HERREID and FULL) 120, 297

—*Pagurus pollicaris*, neuromuscular relationships in the thoracic and abdominal flexor muscles (STEPHENS) 123, 201

—*Pagurus pollicaris*, synapses between giant interneurons and giant flexor motor neurones (STEPHENS) 123, 217

—*Coenobita compressus*, haemolymph acid-base, electrolyte and gas status during exercise (WHEATLY, McMAHON, BURGGREN and PINDER) 125, 225

—*Eupagurus bernhardus*, anatomy and physiology of the segmental giant neurone (HEITLER and FRASER) 125, 245

**Histamine receptors:**

In brain, properties and roles of three subclasses (SCHWARTZ, ARRANG, GARBARG and KORNER) 124, 203

**Homing:**

In humans, still no evidence despite geomagnetic controls (WESTBY and PARTRIDGE) 120, 325

**Honey-bee:**

Iron-containing cells in the fat body (KUTERBACH and WALCOTT) 126, 375, 389

**Hoof:**

Fracture toughness design in the horse (BERTRAM and GOSLINE) 125, 29

**Hormonal control:**

Of the organization and induction of wandering behaviour in *Manduca sexta* larvae (DOMINICK and TRUMAN) 121, 115, 133

—Evidence against a role in integumentary water loss from cockroaches (MACHIN, O'DONNELL and KESTLER) 121, 339

**Hormone release:**

From peptidergic nerve terminals, control by ionic currents (LEMONS and NORDMANN) 124, 53

**Host examination:**

Before oviposition, by a parasitoid wasp (SCHMIDT and SMITH) 125, 271

**Human orientation:**

No evidence for (WESTBY and PARTRIDGE) 120, 325

**Hummingbirds:**

Oxygen consumption during free-ranging hover-feeding (BARTHOLOMEW and LIGHTON) 123, 191

**5-Hydroxytryptamine:**

Effect on cardiac performance in *Busycon canaliculatum* 123, 243

**Hypercapnia:**

Effects on arterial acid-base status in the lizard (GLASS and HEISLER) 122, 13

—Effects on acid-base regulation and ion transfers in carp (CLAIBORNE and HEISLER) 126, 41

**Hypoxia:**

Recovery from, in the intertidal worm, *Sipunculus nudus* (PÖRTNER, VOGELER and GRIESHABER) 122, 37, 51

—Effect on blood flow in *Octopus* (WELLS and WELLS) 122, 345

—Environmental, metabolic responses of trout (DUNN and HOCHACHKA) 123, 229

—Effect on relative distribution of pulmocutaneous blood flow in *Rana catesbeiana* (BOUTILIER, GLASS and HEISLER) 126, 33

—Effect on blood gases and respiratory pattern in exercising fowl (BRACKENBURY) 126, 423

—Effect on ventilation and partitioning of oxygen uptake in *Rana pipiens* (PINDER and BURGGREN) 126, 453

**Identified neurones:**

Containing serotonin, role in the initiation of swimming in the leech (NUSBAUM and KRISTAN) 122, 277; (NUSBAUM) 122, 303

—Role in jumping and kicking in the locust (GYNTHER and PEARSON) 122, 323

—Containing serotonin and proctolin, in the lobster ventral nerve cord (BELTZ and KRAVITZ) 124, 115

***Illex illecebrosus*:**

Bioenergetics of jet propulsion (WEBBER and O'DOR) 126, 205

**Imipramine:**

An inhibitor of octopamine uptake by firefly lanterns (CARLSON and EVANS) 122, 369

**Induced power:**

In the wake of a jackdaw in slow forward flight (SPEDDING) 125, 287

**Infrasound:**

Detection of, by cod (SAND and KARLSEN) 125, 197

**Innervation:**

Of the motor neurones to a steering muscle in locusts (PFLÜGER, ELSON, BINKLE and SCHNEIDER) 120, 403

**Inositol trisphosphate:**

Role in regulation of ion channels (BERRIDGE) 124, 323

—Metabolism of, in clonal pituitary cells (DRUMMOND) 124, 337

**Insect muscle:**

Peptidergic and aminergic modulation of (EVANS and MYERS) 124, 143

**Interlimb coordination:**

During fast walking in the cockroach (TANG and MACMILLAN) 125, 107

**Internal calcium stores:**

Effect of low ambient calcium level on *Oreochromis mossambicus* (FLIK, FENWICK, KOLAR, MAYER-GOSTAN and WENDELAAR BONGA) 120, 249

**Interneurones:**

For abdominal positioning in crayfish, activity during movement (JELLIES and LARIMER) 120, 175

—Morphology and physiology of small white neurones in *Tritonia* buccal ganglia (DORSETT) 122, 237

—In *Lymnaea stagnalis*, stimulation of neuritic outgrowths (ALLISON and BENJAMIN) 122, 447

—Ocellar, in the cockroach brain, classification of (MIZUNAMI and TATEDA) 125, 57

—Ocellar, in the cockroach, multimodality of (OHYAMA and TOH) 125, 405

—In crayfish abdominal ganglia, sensitive to water vibration (TAUTZ and HAMM) 126, 525

**Intestine:**

Of *Aplysia californica*, inhibition of a chloride pump (GERENCSEI) 125, 391

**Ionic currents:**

Role in control of hormone release from peptidergic nerve terminals (LEMONS and NORDMANN) 124, 53

**Ionoregulation:**

In land crabs subjected to dehydration (WOOD, BOUTILIER and RANDALL) 126, 271

**Ion-selective microelectrodes:**

Used to measure intracellular, free calcium in snail salivary gland cells (BARBER) 121, 395

**Ion transport:**

By the intestine of *Aplysia californica* (GERENCSEI) 125, 391

**Iridescence:**

Correlation with changes in iridophore platelet ultrastructure in the squid (COOPER and HANLON) 121, 451

**Iron-containing cells:**

In the fat body of the honey-bee (KUTERBACH and WALCOTT) 126, 375, 389

**Isoproterenol:**

Effects on calcium channel currents in rat myocytes (REUTER, KOKUBUN and PROD'HOM) 124, 191

**Jackdaw:**

*Corvus monedula*, the wake in slow forward flight (SPEDDING) 125, 287

**Japanese house centipede:**

Electrophysiology of the temporal organ (YAMANA, TOH and TATEDA) 126, 297

**Jumping:**

In the locust, intracellular recordings from interneurons and motoneurons (GYNTHER and PEARSON) 122, 323

**Juvenile hormone:**

Role in controlling the release of prothoracicotropic hormone in *Manduca sexta* (ROUNTREE and BOLLENBACHER) 120, 41

—Role in larval–pupal transformation in *Manduca sexta* (WEEKS and TRUMAN) 125, 1

**Kangaroo:**

*Macropus rufus*, responsiveness of the parotid salivary gland to mineralocorticoids (BEAL) 120, 309

—*Macropus rufus*, electrolytes in the mandibular saliva (BEAL) 126, 315

**Keratin:**

Fracture toughness design in horse hoof (BERTRAM and GOSLINE) 125, 29

**Kicking:**

In the locust, intracellular recordings from interneurons and motoneurons (GYNTHER and PEARSON) 122, 323

**Kinematics:**

Of swimming in *Xenopus laevis* tadpoles (VON SECKENDORFF HOFF and WASSERSUG) 122, 1

—Of bat flight (ALDRIDGE) 126, 479

**Lactate:**

Fate of, after exhaustive exercise in rainbow trout (MILLIGAN and WOOD) 123, 93, 123

**L-Lactate:**

Interaction with calcium in the regulation of haemocyanin oxygen affinity during crayfish emersion (MORRIS, TYLER-JONES and TAYLOR) 121, 315; (MORRIS, TYLER-JONES, BRIDGES and TAYLOR) 121, 327

**Lamprey:**

Mechanisms of pH regulation in erythrocytes (NIKINMAA, KUNNAMO-OJALA and RAILO) 122, 355

**Larval–pupal transformation:**

In *Manduca sexta*, hormonally mediated reprogramming of muscles and motoneurons (WEEKS and TRUMAN) 125, 1

**Learning behaviour:**

Motor correlates of, in *Lepomis gibbosus* feeding on novel prey (WAINWRIGHT) 126, 237

**Leech:**

Swim initiation in *Macrobdella decora* (NUSBAUM and KRISTAN) 122, 277; (NUSBAUM) 122, 303

—Influence of oxygen on the heartbeat rhythm of *Hirudo medicinalis* (DAVIS) 123, 401

—Role of acetylcholine in neuromuscular transmission in the heart (CALABRESE and MARANTO) 125, 205

—Formation of specific connections between neurones in culture (ARECHIGA, CHIQUET, KUFFLER and NICHOLLS) 126, 15

**Leg coordination:**

In the walking crayfish (CRUSE and MÜLLER) 121, 349

**Leg muscles:**

Of the cricket, anatomy and innervation (LAURENT and RICHARD) 123, 255

—Of the cricket, electromyographic activity during stepping patterns (LAURENT and RICHARD) 123, 285

**Lizard:**

Accessory lymph sacs and body fluid partitioning in *Sauromalus hispidus* (SMITS) 121, 165

—Effects of hypercapnia on the arterial acid–base status (GLASS and HEISLER) 122, 13

**Loading pressure:**

Response of the isolated heart of *Busycon canaliculatum* (SMITH and HILL) 123, 243

**Lobster:**

Equilibrium reactions of the Norway lobster (NEIL and MIYAN) 126, 157

—Swimmeret proprioceptors in *Nephrops norvegicus* and *Homarus gammarus* (MIYAN and NEIL) 126, 181



**Locomotion:**

- Of hermit crabs on beach and treadmill (HERREID and FULL) **120**, 283, 297
- During predation and defence of *Torpedo marmorata* (BELBENOIT) **121**, 197
- Effect of thermal acclimation on a lungless salamander (FEDER) **121**, 271
- Activity of the cuticular stress detector in crayfish during walking (KLÄRNER and BARNES) **122**, 161
- Organization and role of the proximal musculature of the cricket foreleg (LAURENT and RICHARD) **123**, 255, 285
- Bone strain: a determinant of gait and speed? (BIEWENER and TAYLOR) **123**, 383
- Thermal dependence of lizard muscle performance (MARSH and BENNETT) **126**, 63, 79
- Of squid, bioenergetics of jet propulsion (WEBBER and O'DOR) **126**, 205

**Locust:**

- Central nervous organization of the motor neurones to a steering muscle (PFLÜGER, ELSON, BINKLE and SCHNEIDER) **120**, 403
- Activity of a steering muscle in flying (ELSON and PFLÜGER) **120**, 421
- Ultraviolet sensitivity and spectral opponency of vision (OSORIO) **122**, 193
- Intracellular recordings from neurones during jumping and kicking (GYNTHER and PEARSON) **122**, 323
- Resting potential and potassium-selective electrode measurements on skeletal muscle (LEECH) **122**, 439
- Developmental, electrophysiological and patch-clamp studies on cultured, embryonic muscle cells (DUCE and USHERWOOD) **123**, 307
- Modulatory actions of FMRFamide on skeletal muscle (EVANS and MYERS) **126**, 403

**Luminescence:**

- Of *Maurolicus* photophores, stimulated by cyanide (MALLEFET and BAGUET) **126**, 469

**Lymnaea stagnalis:**

- A potassium-selective channel in isolated heart muscle cells (BREZDEN, MORRIS and GARDNER) **123**, 175

**Lymph sacs:**

- Role in body fluid partitioning in the lizard (SMITS) **121**, 165

**Macropus rufus:**

- Responsiveness of the parotid salivary gland to mineralocorticoids (BEAL) **120**, 309
- Electrolyte concentrations in mandibular saliva (BEAL) **126**, 315

**Magnetization:**

- Natural and induced, in the bobolink (BEASON and BRENNAN) **125**, 49

**Magnetotaxis:**

- Of microorganisms (ESQUIVEL and LINS DE BARROS) **121**, 153

**Malpighian tubules:**

- Of *Rhodnius prolixus*, paracellular water flow during secretion (WHITTEMBURY, BIONDI, PAZ-ALIAGA, LINARES, PARTHE and LINARES) **123**, 71

**Mandibles:**

- Structure and function, in *Carcinus maenas* (ABBY-KALIO and WARNER) **125**, 309

**Manduca sexta:**

- Juvenile hormone controls the release of prothoracicotropic hormone (ROUNTREE and BOLLENBACHER) **120**, 41
- Cellular changes in the prothoracic glands of diapausing pupae (SMITH, BOWEN, BOLLENBACHER and GILBERT) **120**, 131
- The physiology of wandering behaviour (DOMINICK and TRUMAN) **121**, 115, 133
- Hormonally mediated reprogramming of muscles and motoneurones during larval-pupal transformation (WEEKS and TRUMAN) **125**, 1
- FMRFamide-like immunoreactivity in the neurohaemal organs (CARROLL, CARROW and CALABRESE) **126**, 1
- Calcium-dependent action potentials in the prothoracic gland (EUSEBIO and MOODY) **126**, 531

**Marine birds:**

- Role of the lower intestine in adaptation of *Larus glaucescens* to sea water (GOLDSTEIN, HUGHES and BRAUN) **123**, 345

**Maurolicus muelleri:**

- Oxygen consumption and luminescence of photophores (MALLEFET and BAGUET) **126**, 469

**Mechanical work:**

- Effect on electrolyte and water distribution in amphibian skeletal muscle (BOUTILIER, EMILIO and SHELTON) **120**, 333
- Aerobic and anaerobic correlates in an amphibian skeletal muscle (BOUTILIER, EMILIO and SHELTON) **122**, 223

**Mechanics:**

Of muscle contraction in isolated fibres from Antarctic fish (ALTRINGHAM and JOHNSTON) 121, 239

—Of pleating in dragonfly wings (NEWMAN and WOOTTON) 125, 361

**Mechanoreception:**

In the crayfish (TAUTZ and HAMM) 126, 525

**Membrane potential:**

In *Paramecium*, response to changes in external potassium concentration (OKA, NAKAOKA and OOSAWA) 126, 111

**Messenger-mediated control:**

Of potassium channels in secretory cells (PETERSEN, FINDLAY, SUZUKI and DUNNE) 124, 33

**Metabolic heat production:**

Seasonal, by deer mice (CONLEY and PORTER) 126, 249

**Metabolism:**

Changes during swimming in the tufted duck (WOAKES and BUTLER) 120, 215

—Changes in trout exposed to acute environmental hypoxia (DUNN and HOCHACHKA) 123, 229

**Methods:**

Non-invasive measurement of respiratory tidal volume (FUNK, WEBB and MILSOM) 126, 519

**Microspheres:**

Used to measure the distribution of pulmocutaneous heart output to lungs and skin in *Rana catesbeiana* (BOUTILIER, GLASS and HEISLER) 126, 33

**Midgut:**

Of the blue crab, *in vitro* glucose transport (CHU) 123, 325

**Migration:**

Of the bobolink, role of magnetite in the head (BEASON and BRENNAN) 125, 49

—Of the Atlantic cod, possible role of infrasound patterns (SAND and KARLSEN) 125, 197

**Mineralocorticoids:**

Effect on parotid salivary glands of the red kangaroo (BEAL) 120, 309

**Mitochondria:**

In skate liver, osmotic effects of sarcosine oxidation (MOYES, MOON and BALLANTYNE) 125, 181

**Modulation:**

Of the Schwann cells of the squid giant nerve fibre by octopamine (REALE, EVANS and VILLEGAS) 121, 421

—Of feeding interneurons of *Tritonia* (DORSETT) 122, 237

—Of the calcium current of molluscan neurones by neurotransmitters (GERSCHENFELD, HAMMOND and PAUPARDIN-TRITSCH) 124, 73

—Of gap junction permeability in rat lacrimal glands (NEYTON and TRAUTMANN) 124, 93

—Of insect skeletal muscle by peptides and amines (EVANS and MYERS) 124, 143

—Of the serotonin-sensitive potassium channel in *Aplysia* sensory neurone cell body and growth cone (SIEGELBAUM, BELARDETTI, CAMARDO and SHUSTER) 124, 287

—Of ion channels by intracellular messengers in an identified *Aplysia* neurone (LOTSHAW, LEVITAN and LEVITAN) 124, 307

—Of locust muscle by FMRFamide (EVANS and MYERS) 126, 403

**Mollusca:**

Cardiac performance of *Busycon canaliculatum* (SMITH and HILL) 123, 243

**Morphometry:**

Of rat myocardium following exercise training (KAYAR, CONLEY, CLAASSEN and HOPPELER) 120, 189

—Of *Scyliorhinus stellaris* gills in relation to body size (HUGHES, PERRY and PIPER) 121, 27

—Of the gills of the elasmobranch *Scyliorhinus stellaris* (PIPER, SCHEID, PERRY and HUGHES) 123, 27

**Motor neurones:**

Intracellular recordings during cricket eye cleaning behaviour (HENSLEY) 120, 153

—To a steering muscle in locusts, central organization of (PFLÜGER, ELSON, BINKLE and SCHNEIDER) 120, 403

—Morphology of, in the cricket foreleg (LAURENT and RICHARD) 123, 255

—Slow active potentials in crayfish walking legs (SILLAR and HEITLER) 126, 445

**Motor programme:**

For oviposition digging in the grasshopper (THOMPSON) 122, 387, 413

**Multiple types:**

Of calcium channel (McCLESKEY, FOX, FELDMAN and TSIEN) 124, 177

**Muscarinic receptor:**

In B cells of frog sympathetic ganglia (ADAMS, JONES, PENNEFATHER, BROWN, KOCH and LANCASTER) 124, 259

**Muscle:**

Energy cost of contraction in isolated fibres from an Antarctic fish (ALTRINGHAM and JOHNSTON) 121, 239

- Aerobic and anaerobic correlates of mechanical work in *Xenopus* gastrocnemius (BOUTILIER, EMILIO and SHELTON) 122, 223
- Of locust, resting potential and potassium-selective electrode measurements (LEECH) 122, 439
- Cultured from embryonic locusts, developmental, electrophysiological and patch-clamp studies (DUCE and USHERWOOD) 123, 307
- Effects of  $Mg^{2+}$  on the gating of  $Ca^{2+}$ -activated  $K^{+}$  channels (GOLOWASCH, KIRKWOOD and MILLER) 124, 5
- Electrical activity during shivering thermogenesis in the quail (HOHTOLA and STEVENS) 125, 119
- Activity during warm-up and stridulation in the bushcricket (HELLER) 126, 97
- Modulatory actions of FMRFamide in the locust (EVANS and MYERS) 126, 403

#### **Muscle fibres:**

Regeneration of, in closer muscles of the snapping shrimp (GOVIND, MEAROW and WONG) 123, 55

#### **Myofibrillar ATPase:**

Changes during temperature acclimation in carp (HEAP, WATT and GOLDSPIK) 123, 373

#### **Mytilus:**

Epithelial amino acid transport: role in net exchange of taurine between gills and sea water (WRIGHT and SECOMB) 121, 251

#### **Nautilus pompilius:**

Spectral sensitivity of (MUNTZ) 126, 513

#### **Navigation:**

- Of cetaceans, evidence from strandings of geomagnetic sensitivity (KIRSCHVINK, DIZON and WESTPHAL) 120, 1
- Of humans, no evidence despite geomagnetic controls (WESTBY and PARTRIDGE) 120, 325

#### **Nephridia:**

Of *Peripatus acacioi*, ion absorption by the distal nephridial tubules (CAMPIGLIA and MADDRELL) 121, 43

#### **Nerve terminals:**

Control of hormone release by ionic channels (LEMONS and NORDMANN) 124, 53

#### **Nervous control:**

Of colour change in the cuttlefish (MESSENGER and MIYAN) 125, 395

#### **Neuroethology:**

Of wandering behaviour in *Manduca sexta* (DOMINICK and TRUMAN) 121, 115

#### **Neuromodulation:**

In Crustacea, by biogenic amines and peptides (BELTZ and KRAVITZ) 124, 115

#### **Neuromuscular relationships:**

In the thoracic and abdominal flexor muscles of a hermit crab (STEPHENS) 123, 201

#### **Neuromuscular transmission:**

Modulation of, in insect skeletal muscle (EVANS and MYERS) 124, 143

- In the leech heart, role of acetylcholine (CALABRESE and MARANTO) 125, 205

#### **Neurone:**

Sprouting in undamaged, adult molluscan neurones (MAETZOLD and BULLOCH) 122, 427

#### **Neurosecretion:**

Of FMRFamide-like immunoreactivity in *Manduca sexta* (CARROLL, CARROW and CALABRESE) 126, 1

#### **Neurotoxins:**

Used to distinguish between different types of calcium channel (MCCLESKEY, FOX, FELDMAN and TSIEH) 124, 177

#### **Neurotransmission:**

Modulation of the calcium current of molluscan neurones by neurotransmitters (GERSCHENFELD, HAMMOND and PAUPARDIN-TRITSCH) 124, 73

#### **Neurotransmitters:**

At primary afferent synapses in rat spinal cord (JESSELL, YOSHIOKA and JAHR) 124, 239

#### **Ocelli:**

In *Periplaneta americana*, classification of brain interneurons (MIZUNAMI and TATEDA) 125, 57

- In *Periplaneta americana*, multimodality of neurones (OHYAMA and TOH) 125, 405

#### **Octopamine:**

Pharmacology of modulation of the Schwann cells of the squid giant nerve fibre (REALE, EVANS and VILLEGAS) 121, 421

- A high-affinity uptake mechanism, in firefly lanterns (CARLSON and EVANS) 121, 369
- Release from the photomotor neurones of firefly lanterns (CARLSON and JALENAK) 122, 453
- Effect on the blood-brain barrier of the cockroach (SCHOFIELD and TREHERNE) 123, 423
- Role in neuromodulation in *Homarus americanus* (BELTZ and KRAVITZ) 124, 115

**Octopus:**

Effect of acute hypoxia on blood flow (WELLS and WELLS) 122, 345

***Oncorhynchus keta*:**

Acquisition of potential for sperm motility (MORISAWA and MORISAWA) 126, 89

**Oocyte membrane:**

Of *Rhodnius*, rectifying properties of (O'DONNELL) 126, 119

**Optic lobe:**

Of the locust, intracellular recordings show ultraviolet sensitivity and spectral opponency of vision (OSORIO) 122, 193

**Orientation:**

Of the bobolink in magnetic fields (BEASON and BRENNAN) 125, 49

—Of the Atlantic cod during migration, possible role of infrasound patterns (SAND and KARLSEN) 125, 197

**Osmoregulation:**

Of molluscan haemolymph, changes result in neurone sprouting (MAETZOLD and BULLOCH) 122, 427

—Of gulls, role of the lower intestine (GOLDSTEIN, HUGHES and BRAUN) 123, 345

**Oviposition:**

In the grasshopper, functional anatomy and the motor programme (THOMPSON) 122, 387; descending neural control (THOMPSON) 122, 413

—Preceded by measurement of host radius by *Trichogramma* (SCHMIDT and SMITH) 125, 271

**Oxygen consumption:**

Of a lungless salamander, effect of thermal acclimation (FEDER) 121, 271

—During hover-feeding in free-ranging Anna hummingbirds (BARTHOLOMEW and LIGHTON) 123, 191

—Of *Maurolicus* photophores, stimulation by cyanide (MALLEFET and BAGUET) 126, 469

**Oxygen dissociation:**

Curves for tuna blood (JONES, BRILL and MENSE) 120, 201

—Curves for chicken and duck red blood cells (NGUYEN PHU, YAMAGUCHI, SCHEID and PIIPER) 125, 15

**Oxygen receptors:**

Role in generating the heartbeat rhythm in the leech (DAVIS) 123, 401

**Oxygen transport:**

In *Salmo gairdneri* during exercise (PRIMMETT, RANDALL, MAZEAUD and BOUTILIER) 122, 139

—By the blood of free-swimming hagfish (WELLS, FORSTER, DAVISON, TAYLOR, DAVIE and SATCHELL) 123, 43

—By chicken and duck red blood cells (NGUYEN PHU, YAMAGUCHI, SCHEID and PIIPER) 125, 15

—In *Xenopus laevis* diving voluntarily (BOUTILIER and SHELTON) 126, 133

**Oxygen uptake:**

Partitioning of, between lungs and skin in *Rana pipiens* (PINDER and BURGGREN) 126, 453

**Paracellular flow:**

Of water in the Malpighian tubule of *Rhodnius prolixus* (WHITEMBURY, BIONDI, PAZ-ALIAGA, LINARES, PARTHE and LINARES) 123, 71

***Paramecium caudatum*:**

Control of the orientation of cilia by ATP and divalent cations (NOGUCHI, INOUÉ and KUBO) 120, 105

—Adaptation to changes in external potassium concentration (OKA, NAKAOKA and OOSAWA) 126, 111

**Parasitoid wasp:**

Measurement of host radius before oviposition (SCHMIDT and SMITH) 125, 271

**Patch-clamp technique:**

To detect potassium channels in cockroach central nervous system glial cells (LEECH) 122, 443

—To study modulation of gap junction permeability (NEYTON and TRAUTMANN) 124, 93

—In the study of multiple types of calcium channel (McCLESKEY, FOX, FELDMAN and TSIEH) 124, 177

**Peptides:**

Modulation of insect skeletal muscle by (EVANS and MYERS) 124, 143

—In synaptic connections made between cultured leech neurones (ARECHIGA, CHIQUET, KUFFLER and NICHOLLS) 126, 15

—Modulation of locust skeletal muscle by (EVANS and MYERS) 126, 403

***Peripatus acacioi*:**

Hyperosmotic fluid absorption by the distal nephridial tubules (CAMPILIA and MADRELL) 121, 43

***Periplaneta americana*:**

Spontaneous miniature potentials in the denervated coxal muscle fibres (WASHIO) 120, 143

- Evidence against hormonal control of integumentary water loss (MACHIN, O'DONNELL and KESTLER) 121, 339
- Octopamine sensitivity of the blood-brain barrier (SCHOFIELD and TREHERNE) 123, 423
- Classification of ocellar interneurons in the brain (MIZUNAMI and TATEDA) 125, 57
- Multimodality of ocellar interneurons (OHYAMA and TOH) 125, 405
- pH:**
  - Of *Xenopus laevis* blood during diving (BOUTILIER and SHELTON) 122, 209
  - Of red cells, interactions with haemoglobin oxygen-carrying capacity in acute acidosis in rainbow trout (BOUTILIER, IWAMA and RANDALL) 123, 145
  - Intracellular, in perfused rainbow trout hearts (FARRELL and MILLIGAN) 125, 347
  - Changes in water flowing over trout gills (WRIGHT, HEMING and RANDALL) 126, 499
- pH compensation:**
  - During environmental hypercapnia in the lizard (GLASS and HEISLER) 122, 13
  - During recovery from environmental hypoxia in an intertidal worm (PÖRTNER, VOGELER and GRIESHABER) 122, 51
- pH regulation:**
  - In *Salmo gairdneri* during exercise (PRIMMETT, RANDALL, MAZEAUD and BOUTILIER) 122, 139
  - Mechanisms of, in lamprey erythrocytes (NIKINMAA, KUNNAMO-OJALA and RAILO) 122, 355
  - In *Salmo gairdneri* after exhaustive exercise (MILLIGAN and WOOD) 123, 93, 123
- Phorbol esters:**
  - Effect on levels in intracellular calcium (MOOLENAAR, DEFIZE and DE LAAT) 124, 359
  - Role in the regulation of neuronal ion channels (KACZMAREK) 124, 375
- Phosphatidylinositol:**
  - Stimulation of hydrolysis by histamine receptors in brain (SCHWARTZ, ARRANG, GARBARG and KORNER) 124, 203
  - Hydrolysis of, to give two intracellular messengers (BERRIDGE) 124, 323
- Photomotor neurone:**
  - Release of octopamine from, in firefly (CARLSON and JALENAK) 122, 453
- Photophore:**
  - Stimulation by cyanide in *Maurolicus muelleri* (MALLEFET and BAGUET) 126, 469
- Phototaxis:**
  - Of *Nautilus pompilius*, used to measure spectral sensitivity (MUNTZ) 126, 513
- Pigments:**
  - Migration of, in the crayfish eye (BRYCESON) 125, 401
- Pinna:**
  - Of the Tammar wallaby, biophysical properties and role in directional hearing (COLES and GUPPY) 121, 371
- Planar phospholipid bilayers:**
  - Insertion of K<sup>+</sup> channels and their activity (GOLOWASCH, KIRKWOOD and MILLER) 124, 5
- Plasticity:**
  - Of undamaged, adult molluscan neurones (MAETZOLD and BULLOCH) 122, 427
- Plateau-like potentials:**
  - In walking-leg motor neurones in the crayfish (SILLAR and HEITLER) 126, 445
- Porphyrropsin:**
  - In vivo* regeneration in goldfish retina (TSIN and FLORES) 122, 269
- Posture:**
  - Used in assessment of host radius before oviposition by a parasitoid wasp (SCHMIDT and SMITH) 125, 271
- Potassium:**
  - Causes changes in membrane potential in *Paramecium* (OKA, NAKAOKA and OOSAWA) 126, 111
- Potassium channel:**
  - Detection by the patch-clamp technique, in glial cells in cockroach central nervous system (LEECH) 122, 443
  - In isolated *Lymnaea stagnalis* heart muscle cells (BREZDEN, MORRIS and GARDNER) 123, 175
  - In secretory cells, messenger-mediated control of (PETERSEN, FINDLAY, SUZUKI and DUNNE) 124, 33
  - Modulation of, in *Aplysia* sensory neurone cell body and growth cone (SIEGELBAUM, BELARDETTI, CAMARDO and SHUSTER) 124, 287
  - In *Rhodnius* oocyte membranes (O'DONNELL) 126, 119
- Potassium-selective electrode:**
  - Measurements on locust skeletal muscle (LEECH) 122, 439
- Pressure changes:**
  - Measurement of, for colloids in microlitre and sub-microlitre samples (RIEGEL) 122, 433
  - During aquatic prey capture in fishes (LAUDER) 125, 411

**Prey capture:**

- Distance and size discrimination by *Ranatra linearis* (CLOAREC) 120, 59
- Binocular spatial localization in the praying mantis (ROSSEL) 120, 265
- Role of electric discharge in *Torpedo marmorata* (BELBENOIT) 121, 179
- In fishes, experimental and theoretical approaches (LAUDER) 125, 411
- By *Lepomis gibbosus* feeding on novel prey (WAINWRIGHT) 126, 237

**Proreioceptors:**

- In crayfish cuticle (KLÄRNER and BARTH) 122, 147; (KLÄRNER and BARNES) 122, 161
- In lobster swimmerets (NEIL and MIYAN) 126, 157; (MIYAN and NEIL) 126, 181
- In the basal limb of the crayfish (SILLAR and HEITLER) 126, 445

**Protein kinase C:**

- Role in ionic signalling by growth factors (MOOLENAAR, DEFIZE and DE LAAT) 124, 359
- Role in the regulation of neuronal ion channels (KACZMAREK) 124, 375

**Prothoracic gland:**

- Of *Manduca sexta*,  $\text{Ca}^{2+}$ -dependent action potentials (EUSEBIO and MOODY) 126, 531

**Prothoracicotropic hormone:**

- In *Manduca sexta*, release is controlled by juvenile hormone (ROUNTREE and BOLLENBACHER) 120, 41
- Response to, in prothoracic glands of diapausing *Manduca sexta* (SMITH, BOWEN, BOLLENBACHER and GILBERT) 120, 131

***Pseudopotamilla ocellata*:**

- Withdrawal reflex of (HIGUCHI, NAKAMURA, SAWAUCHI and OKUMURA) 126, 433

**Pulmonary mechanics:**

- In the turtle (VITALIS and MILSOM) 125, 137, 157

**Pulmonary receptors:**

- Role in control of ventilation in the turtle (MILSOM and CHAN) 120, 233

**Quail:**

- Muscle electrical activity, tremor and heat production during shivering (HOHTOLA and STEVENS) 125, 119

***Rana pipiens*:**

- Ventilation and partitioning of oxygen uptake (PINDER and BURGGREN) 126, 453

**Receptor potential:**

- Associated with contraction in a heliozoan (FEBVRE-CHEVALIER, BILBAUT, BONE and FEBVRE) 122, 177

**Reconstitution:**

- Of  $\text{Ca}^{2+}$ -activated  $\text{K}^{+}$  channels from mammalian skeletal muscle in planar, phospholipid bilayers (GOLOWASCH, KIRKWOOD and MILLER) 124, 5

**Rectal gland:**

- Control of secretion, in the dogfish (ERLI and RUBIO) 122, 99
- Of the dogfish, perfusion-secretion relationships (SHUTTLEWORTH and THOMPSON) 125, 373

**Rectification:**

- Of the oocyte membrane of *Rhodnius* (O'DONNELL) 126, 119

**Red blood cells:**

- In the lamprey, mechanisms of pH regulation (NIKINMAA, KUNNAMO-OJALA and RAILO) 122, 355
- Kinetics of oxygen uptake and release in chicken and duck (NGUYEN PHU, YAMAGUCHI, SCHEID and PIPER) 125, 15

**Regeneration:**

- Of nerve terminals in denervated coxal muscle fibres of the cockroach (WASHIO) 120, 143
- Of muscle fibre types in paired, asymmetric closer muscles of snapping shrimps (GOVIND, MEAROW and WONG) 123, 55

**Renal function:**

- Of the hagfish, *Eptatretus stouti* (RIEGEL) 123, 359

**Reptiles:**

- A triphasic ventilator for (HASAN) 123, 441
- Pulmonary mechanics of *Pseudemys scripta* (VITALIS and MILSOM) 125, 135, 157

**Respiration:**

- Of a desert beetle beneath the sand (LOUW, NICOLSON and SEELY) 120, 443
- Of reptiles, use of a triphasic ventilator (HASAN) 123, 441
- Of exercising fowl (BRACKENBURY) 126, 423
- Non-invasive measurement of tidal volume (FUNK, WEBB and MILSOM) 126, 519

**Resting potential:**

- Measurement in locust skeletal muscle (LEECH) 122, 439

***Rhodnius prolixus*:**

Paracellular water flow during secretion by the Malpighian tubules

(WHITTEMBURY, BIONDI, PAZ-ALIAGA, LINARES, PARTHE and LINARES) 123, 71

—Action potentials in oocyte membranes (O'DONNELL) 126, 119

**Rhodopsin:**

*In vivo* regeneration in goldfish retina (TSIN and FLORES) 122, 269

**Rhythmicity:**

In the structure and function of the compound eye of *Ligia exotica* (HARIYAMA, MEYER-ROCHOW and EGUCHI) 123, 1

**Root effect:**

Unusual features of the CO<sub>2</sub>-combining curves of tuna blood (JONES, BRILL and MENSE) 120, 201

**Safety factors:**

Of the adductor muscles of crab mandibles (ABBY-KALIO and WARNER) 125, 309

**Salamander:**

*Desmognathus ochrophaeus*, effect of thermal acclimation on energetics and locomotor performance (FEDER) 121, 271

**Saliva:**

Parotid, in the red kangaroo, responsiveness to mineralocorticoids (BEAL) 120, 309

—Mandibular, in the red kangaroo, electrolyte concentrations (BEAL) 126, 315

**Salivary gland cells:**

In the snail, measurement of intracellular, free calcium concentrations (BARBER) 121, 395

***Salmo gairdneri*:**

Role of catecholamines in erythrocyte pH regulation and oxygen transport during exercise (PRIMMETT, RANDALL, MAZEAUD and BOUTILIER) 122, 139

—Acid-base status after exhaustive exercise (MILLIGAN and WOOD) 123, 93, 123

—Promotion of catecholamine release by acute acidosis (BOUTILIER, IWAMA and RANDALL) 123, 145

—Metabolic responses to acute environmental hypoxia (DUNN and HOCHACHKA) 123, 229

—Plasma catecholamines at rest and during exercise (BUTLER, METCALFE and GINLEY) 123, 409

—Mechanical properties of the perfused heart (FARRELL, MACLEOD and CHANCEY) 125, 319

—Intracellular pH of the perfused heart (FARRELL and MILLIGAN) 125, 347

—Acquisition of potential for sperm motility (MORISAWA and MORISAWA) 126, 89

—Downstream pH changes in water flowing over the gills (WRIGHT, HEMING and RANDALL) 126, 499

**Salt balance:**

In the spider, effects of feeding upon hydrated animals (BUTT and TAYLOR) 125, 85

**Salt secretion:**

In the isolated dogfish rectal gland (SHUTTLEWORTH and THOMPSON) 125, 373

**Sand:**

Respiration of a buried tenebrionid beetle (LOUW, NICOLSON and SEELY) 120, 443

**Sarcosine:**

Osmotic effects of oxidation on skate liver mitochondria (MOYES, MOON and BALLANTYNE) 125, 181

***Sauromalus hispidus*:**

Accessory lymph sacs and body fluid partitioning (SMITS) 121, 165

**Scaling:**

Of body mass to diving endurance and oxygen stores in the Pekin duck (HUDSON and JONES) 120, 351

***Sceloporus occidentalis*:**

Thermal dependence of muscle properties (MARSH and BENNETT) 126, 63

***Scyliorhinus canicula*:**

Plasma catecholamines at rest and during exercise (BUTLER, METCALFE and GINLEY) 123, 409

**Sea anemone:**

Role of chemoreception in the pre-feeding response (BOOTHBY and MCFARLANE) 125, 385

**Sea cucumber:**

Effects of ionic environment on viscosity of catch connective tissue (HAYASHI and MOTOKAWA) 125, 71

**Secretion:**

Water flow in the Malpighian tubules of *Rhodnius prolixus* (WHITTEMBURY, BIONDI, PAZ-ALIAGA, LINARES, PARTHE and LINARES) 123, 71

—Of hormones from peptidergic nerve terminals, role of ionic channels (LEMONS and NORDMANN) 124, 53

**Secretory cells:**

Messenger-mediated control of potassium channels (PETERSEN, FINDLAY, SUZUKI and DUNNE) 124, 33

**Secretory epithelium:**

In the clam mantle, two types of action potential (BEIRÃO and SORENSON) 121, 179

—Role of the channel cells in the body wall of a terrestrial slug (MARTIN and DEYRUP-OLSEN) 121, 301

**Segmental giant neurone:**

In the crayfish, interaction with abdominal fast flexor and swimmeret motor neurones (HEITLER and DARRIG) 121, 55

—In the hermit crab, anatomy and physiology (HEITLER and FRASER) 125, 245

**Sensorimotor systems:**

For abdominal positioning in the crayfish (JELLIES and LARIMER) 120, 173

**Sensory inputs:**

Effects on behaviour and neural circuitry in the *Lymnaea* feeding system (KEMENES, ELLIOTT and BENJAMIN) 122, 113

**Sensory integration:**

In the crayfish swimmeret system (HEITLER) 120, 387

**Serotonin:**

Role in modulation of the calcium current in molluscan neurones (GERSCHENFELD, HAMMOND and PAUPARDIN-TRITSCH) 124, 73

—Role in neuromodulation in crustaceans (BELTZ and KRAVITZ) 124, 115

—Role in neuromodulation in *Aplysia* (LOTSHAW, LEVITAN and LEVITAN) 124, 307

**Serotonin-containing neurones:**

Role in initiation of swimming in the leech (NUSBAUM and KRISTAN) 122, 277; (NUSBAUM) 122, 303

**Shivering:**

In the quail, relationship of muscle electrical activity, tremor and heat production (HOHTOLA and STEVENS) 125, 119

**Shrimp:**

Regeneration of muscle fibres in the closer muscle of *Alpheus heterochelis* (GOVIND, MEAROW and WONG) 123, 55

**Single-channel recording:**

From isolated heart muscle cells from *Lymnaea stagnalis* (BREZDEN, MORRIS and GARDNER) 123, 175

—From cultured muscle cells taken from embryonic locusts (DUCE and USHERWOOD) 123, 307

**Single channels:**

Allosteric effects of  $Mg^{2+}$  on the gating of  $Ca^{2+}$ -activated  $K^{+}$  channels from mammalian skeletal muscle (GOLOWASCH, KIRKWOOD and MILLER) 124, 5

***Sipunculus nudus*:**

Recovery from anaerobiosis (PÖRTNER, VOGELER and GRIESHABER) 122, 37, 51

**Skate:**

Osmotic effects of amino acid oxidation on liver mitochondria (MOYES, MOON and BALLANTYNE) 125, 181

**Skeletal muscle:**

Of flounder, effect of temperature and thermal acclimation (JOHNSTON and WOKOMA) 120, 119

—Of amphibians, effect of mechanical work on electrolyte and water distribution (BOUTILIER, EMILIO and SHELTON) 120, 333

—Of the lizard, thermal dependence of contractile properties (MARSH and BENNETT) 126, 63, 79

**Skin:**

Experimental ventilation of, effect on cutaneous gas exchange in the bullfrog (BURGGREN and FEDER) 121, 445

**Slow EPSP:**

In bullfrog sympathetic ganglia, caused by a peptide released from boutons on C cells (ADAMS, JONES, PENNEFATHER, BROWN, KOCH and LANCASTER) 124, 259

**Slug:**

*Ariolimax columbianus*, role of the epithelial channel cells of the body wall in slime secretion (MARTIN and DEYRUP-OLSEN) 121, 301

**Snail:**

*Planorbis corneus*, measurement of intracellular, free calcium in salivary gland cells (BARBER) 121, 395

—*Lymnaea stagnalis*, effects of sensory inputs to the feeding system (KEMENES, ELLIOTT and BENJAMIN) 122, 113

—*Lymnaea stagnalis*, stimulation of outgrowths in undamaged neurones (ALLISON and BENJAMIN) 122, 447

**Sodium:**

Absorption by the distal nephridial tubules of *Peripatus acacioi* (CAMPIGLIA and MADDRELL) 121, 43

—Amiloride-sensitive flux in perfused crab gill preparations (LUCU and SIEBERS) 122, 25



**Sodium/proton exchange:**

In lamprey red blood cells (NIKINMAA, KUNNAMO-OJALA and RAILO) 122, 355

**Spectral sensitivity:**

Of the crayfish eye (BRYCESON) 125, 401

—Of *Nautilus pompilius* (MUNTZ) 126, 513

**Speed:**

Role of bone strain in determination of (BIEWENER and TAYLOR) 123, 383

**Sperm motility:**

In rainbow trout and chum salmon (MORISAWA and MORISAWA) 126, 89

**Spider:**

Effects of feeding on salt and water balance (BUTT and TAYLOR) 125, 85

**Spinal cord:**

Amino acid receptor-mediated transmission at primary afferent synapses in rat spinal cord (JESSELL, YOSHIOKA and JAHR) 124, 239

**Sprouting:**

Of undamaged, adult molluscan neurones in response to changes in haemolymph osmolality (MAETZOLD and BULLOCH) 122, 427

—Of undamaged neurones in *Lymnaea stagnalis* (ALLISON and BENJAMIN) 122, 447

**Squalus acanthias:**

Acid-base status of pups *in utero* (KORMANIK and EVANS) 125, 173

**Squid:**

Localization and stimulation of chromatophore motoneurones in the brain of *Lolliguncula brevis* (DUBAS, HANLON, FERGUSON and PINSKER) 121, 1

—Octopaminergic modulation of the membrane potential of the Schwann cell of the giant nerve fibre (REALE, EVANS and VILLEGAS) 121, 421

—*Lolliguncula brevis*, correlation of iridescence with iridophore platelet ultrastructure (COOPER and HANLON) 121, 451

—*Illex illecebrosus*, bioenergetics of jet propulsion (WEBBER and O'DOR) 126, 205

**Starling response:**

Of the heart of *Salmo gairdneri* (FARRELL, MACLEOD and CHANCEY) 125, 319

**Starvation:**

Effect of myofibrillar ATPase levels in carp (HEAP, WATT and GOLDSPIK) 123, 373

**Steering muscle:**

Central nervous organization of motor neurones to, in the locust (PFLÜGER, ELSON, BINKLE and SCHNEIDER) 120, 403

—Activity of, in flying locusts (ELSON and PFLÜGER) 120, 421

**Stepping patterns:**

In fast-walking cockroaches (TANG and MACMILLAN) 125, 107

**Stereopsis:**

In two species of praying mantis (ROSSEL) 120, 265

**Steroid secretion:**

By *Manduca sexta* prothoracic glands (EUSEBIO and MOODY) 126, 531

**Stick insect:**

*Ranatra linearis*, distance and size discrimination in prey capture (CLOAREC) 120, 59

—Feedback in the femur-tibia control system (WEILAND, BÄSSLER and BRUNNER) 120, 369

**Stress detector:**

In the crayfish cuticle, physiology of (KLÄRNER and BARTH) 122, 149; (KLÄRNER and BARNES) 122, 161

**Stretch-sensitive channel:**

In isolated *Lymnaea stagnalis* heart muscle cells (BREZDEN, GARDNER and MORRIS) 123, 175

**Stridulation:**

In the bushcricket (HELLER) 126, 97

**Submergence:**

Role of nasal receptors in cardiac response in diving ducks (FURILLA and JONES) 121, 227

**Suction feeding:**

In fishes (LAUDER) 125, 411

—Of *Lepomis gibbosus* feeding on novel prey (WAINWRIGHT) 126, 237

**Swimmeret:**

Aspects of sensory integration in the crayfish (HEITLER) 120, 387

—Motor neurones, interaction with segmental giant neurones in the crayfish (HEITLER and DARRIG) 121, 55

—Proprioceptors in lobsters (NEIL and MIYAN) 126, 157; (MIYAN and NEIL) 126, 181

**Swimming:**

In the tufted duck, respiratory, circulatory and metabolic adjustments (WOAKES and BUTLER) 120, 215

- Kinematics of, in tadpoles (VON SECKENDORFF HOFF and WASSERSUG) 122, 1
- Initiation of, in the leech (NUSBAUM and KRISTAN) 122, 277; (NUSBAUM) 122, 303
- Sympathetic ganglion:**
  - Slow synaptic transmission in, in bullfrog (ADAMS, JONES, PENNEFATHER, BROWN, KOCH and LANCASTER) 124, 259
- Synapses:**
  - Between the giant interneurons and giant flexor motor neurones of the hermit crab (STEPHENS) 123, 217
- Synaptic connections:**
  - Specificity of, in sensory neurone development (DODD and JESSELL) 124, 225
- Physiology of, between leech neurones in culture (ARECHIGA, CHIQUET, KUFFLER and NICHOLLS) 126, 15
- Tadpoles:**
  - Of *Xenopus laevis*, kinematics of swimming (VON SECKENDORFF HOFF and WASSERSUG) 122, 1
- Tail-flip:**
  - Electrophysiology of, in the crayfish *Pacifastacus leniusculus* (HEITLER and DARRIG) 121, 55
- Homology of hermit crab and crayfish giant neurones (HEITLER and FRASER) 125, 245
- Teleost fish:**
  - Effects of temperature and thermal acclimation on skeletal muscle of flounder (*Platichthys flesus*) (JOHNSTON and WOKOMA) 120, 119
- Oreochromis mossambicus*, bidirectional calcium fluxes and internal calcium stores (FLIK, FENWICK, KOLAR, MAYER-GOSTAN and WENDELAAR BONGA) 120, 249
- Responses to hypersaline conditions in *Catostomus commersoni* (WILKES and MCMAHON) 121, 77, 95
- Cardiovascular responses to vascular compression in the sea raven (FARRELL) 122, 65
- Control of blood pressure in exercising cod (AXELSSON and NILSSON) 126, 225
- Temperature:**
  - Effect on activity of myofibrillar ATPase in carp (HEAP, WATT and GOLDSPIK) 123, 373
- Effect on contractile properties of lizard muscle (MARSH and BENNETT) 126, 63, 79
- Temporal organ:**
  - Physiology of, in the Japanese house centipede (YAMANA, TOH and TATEDA) 126, 297
- Thereuonema hilgendorfi:**
  - Electrophysiology of the temporal organ (YAMANA, TOH and TATEDA) 126, 297
- Thermal acclimation:**
  - Effect on contractile properties and metabolism of winter flounder skeletal muscle (JOHNSTON and WOKOMA) 120, 119
- Of a lungless salamander, effects on energetics and locomotor performance (FEDER) 121, 271
- Thermogenesis:**
  - In the bushcricket (HELLER) 126, 97
- Thermoregulation:**
  - By intermediate-sized fruit bats in flight (CARPENTER) 120, 79
  - By deer mice, seasonal limits of (CONLEY and PORTER) 126, 249
- Thyrotropin-releasing hormone:**
  - Stimulates growth hormone and prolactin release from clonal pituitary cells (DRUMMOND) 124, 337
- Tidal volume:**
  - Measurement of, in aquatic, air-breathing animals (FUNK, WEBB and MILSOM) 126, 519
- Tissue culture:**
  - Of heart muscle cells from *Lymnaea stagnalis* (BREZDEN, GARDNER and MORRIS) 123, 175
- Of muscle cells from *Locusta migratoria* and *Schistocerca gregaria* embryos (DUCE and USHERWOOD) 123, 307
- Of leech neurones, formation of specific connections (ARECHIGA, CHIQUET, KUFFLER and NICHOLLS) 126, 15
- Tonicity:**
  - Effect on sarcosine oxidation by skate liver mitochondria (MOYES, MOON and BALLANTYNE) 125, 181
- Torpedo marmorata:**
  - Fine analysis of predatory and defensive motor events (BELBENOIT) 121, 197
- Toughness:**
  - Resistance of horse hoof keratin to fracture (BERTRAM and GOSLINE) 125, 29
- Transbranchial potentials:**
  - In perfused gill filaments of the crab (LUCU and SIEBERS) 122, 25

**Transmitter uptake:**

A high-affinity uptake mechanism for octopamine in firefly lanterns (CARLSON and EVANS) 122, 369

**Tremor:**

During shivering thermogenesis in the quail (HOHTOLA and STEVENS) 125, 119

**Trichogramma:**

Measurement of host radius before oviposition (SCHMIDT and SMITH) 125, 271

**Tritonia hombergi:**

Morphology and physiology of small white neurones in the buccal ganglia (DORSETT) 122, 237

**Turning:**

Wind tunnel studies of dragonfly flight (ALEXANDER) 122, 81

**Turtle:**

*Chrysemys picta*, relationship between lung volume, respiratory drive and breathing pattern (MILSOM and CHAN) 120, 233

—*Pseudemys scripta elegans*, use of a triphasic ventilator (HASAN) 123, 441

—*Pseudemys scripta*, pulmonary mechanics of (VITALIS and MILSOM) 125, 137, 157

**Ultrasonic telemetry:**

Of jet pressure in free-swimming squid (WEBBER and O'DOR) 126, 205

**Ultrastructure:**

Of iridophore platelets in the squid (COOPER and HANLON) 121, 451

**Vascular compression:**

Effect on cardiovascular system of the sea raven (FARRELL) 122, 65

**Ventilation:**

Control of, in the turtle *Chrysemys picta* (MILSOM and CHAN) 120, 233

—Of the skin, effect on cutaneous gas exchange in the bullfrog (BURGGREN and FEDER) 121, 445

—Artificial, of reptiles (HASAN) 123, 441

—Measurement of, in aquatic, air-breathing animals (FUNK, WEBB and MILSOM) 126, 519

**Vibration:**

In water, sensitivity of crayfish (TAUTZ and HAMM) 126, 525

**Viscosity:**

Of sea cucumber catch connective tissue, effects of ionic environment (HAYASHI and MOTOKAWA) 125, 71

**Vision:**

Distance and size discrimination in prey capture by a stick insect (CLOAREC) 120, 59

—Binocular spatial localization in the praying mantis (ROSSEL) 120, 265

—In the locust, ultraviolet sensitivity and spectral opponency (OSORIO) 122, 193

—*In vivo* regeneration of rhodopsin and porphyropsin in goldfish retina (TSIN and FLORES) 122, 269

—Diurnal changes in structure and function of the compound eye of *Ligia exotica* (HARIYAMA, MEYER-ROCHOW and EGUCHI) 123, 1

—Effect of pigment migration on spectral sensitivity in the crayfish (BRYCESON) 125, 401

—Spectral sensitivity of *Nautilus pompilius* (MUNTZ) 126, 513

**Volume expansion:**

Effect on rectal gland secretion in the dogfish (ERLU and RUBIO) 122, 99

**Wake:**

Of the jackdaw in slow forward flight (SPEDDING) 125, 287

**Walking:**

Of the hermit crab on beach and treadmill (HERREID and FULL) 120, 283

—In stick insects, the artificially closed femur-tibia control system (WEILAND, BÄSSLER and BRUNNER) 120, 369

—Two mechanisms determining leg coordination in the crayfish (CRUSE and MÜLLER) 121, 349

—Interlimb coordination in the cockroach (TANG and MACMILLAN) 125, 107

**Wallaby:**

*Macropus eugenii*, biophysical aspects of directional hearing (COLES and GUPPY) 121, 371

**Wandering:**

Physiology of, in larvae of *Manduca sexta* (DOMINICK and TRUMAN) 121, 115, 133

**Water balance:**

In the spider, effects of feeding upon hydrated animals (BUTT and TAYLOR) 125, 85

**Water distribution:**

In amphibian skeletal muscle, effects of mechanical work (BOUTILIER, EMILIO and SHELTON) 120, 333

**Water loss:**

From cockroaches, evidence against hormonal control (MACHIN, O'DONNELL and KESTLER) 121, 339

**Water transport:**

Across seawater eel intestine, a new measurement technique (ANDO, SASAKI and HUANG) 122, 257

**Wings:**

Of the dragonfly, the mechanics of pleating (NEWMAN and WOOTTON) 125, 361

**Withdrawal reflex:**

Of a sabellid worm (HIGUCHI, NAKAMURA, SAWAUCHI and OKUMURA) 126, 433

**Work of breathing:**

In the turtle (VITALIS and MILSOM) 125, 137

***Xenopus laevis*:**

Respiratory properties of blood during voluntary and forced dives (BOUTILIER and SHELTON) 121, 285

—Kinematics of swimming in tadpoles (VON SECKENDORFF HOFF and WASSERSUG) 122, 1

—Effects of diving on ventilation, blood gases and pH (BOUTILIER and SHELTON) 122, 209

—Aerobic and anaerobic correlates of mechanical work by gastrocnemius muscle (BOUTILIER, EMILIO and SHELTON) 122, 223

—Gas exchange, storage and transport in diving (BOUTILIER and SHELTON) 126, 133
